# Supplementary material for: Attenuated Lactococcus lactis and Surface Bacteria as Tools for Conditioning the Microbiota and Driving the Ripening of Semisoft Caciotta Cheese
Source: PubMed Central journal article supplement (PMC7028956; doi:10.1128/aem.02165-19), 2020-02-18
Supplement: AEM.02165-19-s0001.pdf [file AEM.02165-19-s0001.pdf]

## 1 RESULTS

2 **Kinetics of growth and enzymatic activities.** *Leuc. lactis* MC11, *V. casei* DSM22364, *St. equorum*  
3 DSM15097 and *B. thermosphacta* MC25 were representatives of the surface microbiota of Caciotta  
4 cheese (21, 69, 70). Preliminarily, the capability of each strain to grow in cheese matrix was assessed  
5 using cheese broth (CB) as model system (71). To simulate the cheese surface contamination, the  
6 initial inoculum was 2.0 log CFU/ml. Inoculated CB was held at room temperature (25 °C) for 12 h,  
7 with a further stay at 9 °C for 10 days. All strains reached the stationary phase after 7 days. The final  
8 cell density varied from  $8.1 \pm 0.12$  (*B. thermosphacta* MC25) to  $8.6 \pm 0.07$  (*Leuc. lactis* MC11) log  
9 CFU/ml (data not shown).

10 Preliminarily, aminopeptidase type N (pepN), proline iminopeptidase (pepI), endopeptidase type  
11 O (pepO), glutamate dehydrogenase (GDH), cystathionine gamma lyase (CGL) and esterase activities  
12 of *Lc. lactis* subsp. *lactis* CC01, *Leuc. lactis* MC11, *V. casei* DSM22364, *St. equorum* DSM15097  
13 and *B. thermosphacta* MC25 were assessed on synthetic substrates (Table S1). Except for pepI and  
14 pepO, which were the highest for attenuated *Lc. lactis* CC01, all the other enzyme activities were at  
15 the highest levels in *Leuc. lactis* and *B. thermosphacta*. Nevertheless, all the strains assessed showed  
16 remarkable enzyme activities.

17 **Table S1.** Enzymatic activities<sup>1</sup> of *Lactococcus lactis* subsp. *lactis* CC1 (LCL), *Leuconostoc lactis* MC11 (LL), *Vibrio casei* DSM22364 (VC),  
 18 *Staphylococcus equorum* DSM15097 (SE), *Brochothrix thermosphacta* MC25 (BX).

| <b>Enzymes</b>            | <b>LCL</b> | <b>LL</b>  | <b>VC</b>  | <b>SE</b>  | <b>BX</b>  |
|---------------------------|------------|------------|------------|------------|------------|
| Aminopeptidase type N     | 15.8±0.45B | 26±0.94A   | 3.4±0.13C  | 2.7±0.08C  | 13±0.52B   |
| Proline iminopeptidase    | 16.6±0.68A | 5.9±0.22AB | 2.16±0.09B | 6.3±0.24AB | 7.9±0.31A  |
| Endopeptidase type O      | 8.3±0.26A  | 1.8±0.06B  | 1.9±0.04B  | 0          | 2.2±0.09B  |
| Glutamate dehydrogenase   | 0.4±0.01B  | 1.8±0.05A  | 0.5±0.02B  | 0          | 0.5±0.01B  |
| Cystathionine gamma-lyase | 0          | 16.5±0.31A | 0          | 0          | 11.2±0.17B |
| Esterase                  | 0          | 3.88±0.15A | 1.5±0.06B  | 0          | 4.21±0.12A |

19 Data in the same row with different letters (A-C) are significantly different ( $P < 0.05$ ).

20 <sup>1</sup>Arbitrary units (see Materials and Methods). Values represent the average (± SD) of 3 triplicates.

21

22 **Table S2.** Concentrations (mg/kg) of total and individual free amino acids and of amino acid derivatives at surface (s) and core (c) level of control  
23 cheese (CC), cheese added of attenuated culture of *Lactococcus lactis* subsp. *lactis* CC1 (ATT) and ATT cheeses with the additions, as surface adjunct  
24 cultures (2 log CFU/cm<sup>2</sup>), of *Leuconostoc lactis* MC11 (LL), *Vibrio casei* DSM22364 (VC), *Staphylococcus equorum* DSM15097 (SE), *Brochothrix*  
25 *thermosphacta* MC25 (BX) individually or in mix (MIX) after 1, 10, 20 or 30 days of ripening.

| 1 day of ripening |         |         |          |         |         |         |          |         |        |          |          |          |         |          |
|-------------------|---------|---------|----------|---------|---------|---------|----------|---------|--------|----------|----------|----------|---------|----------|
| FAA               | CCs     | ATTs    | LLs      | VCs     | SEs     | BXs     | MIXs     | CCc     | ATTc   | LLc      | VCc      | SEc      | BXc     | MIXc     |
| <b>Asp</b>        | 24.5C   | 53.4B   | 47.2BC   | 88.8A   | 57.0B   | 82.4A   | 77.1AB   | 6.3D    | 9.6D   | 41.2BC   | 43.3BC   | 39.8BC   | 34.3BC  | 34.9BC   |
| <b>Thr</b>        | 15.4B   | 41.1AB  | 38.9AB   | 57.7A   | 13.6B   | 56.6A   | 46.0AB   | 0.0     | 17.4B  | 47.4AB   | 48.0AB   | 47.1AB   | 34.4AB  | 42.6ABA  |
| <b>Ser</b>        | 37.1C   | 95.5BC  | 144.4B   | 209.6A  | 49.0C   | 207.2A  | 147.2B   | 47.8C   | 52.4C  | 175.5AB  | 180.7AB  | 179.0AB  | 127.8B  | 168.2AB  |
| <b>Glu</b>        | 108.3C  | 284.0B  | 396.4A   | 409.8A  | 291.5B  | 438.8A  | 212.9B   | 33.5D   | 98.9D  | 266.0B   | 262.9B   | 258.1B   | 211.7B  | 242.1B   |
| <b>Gly</b>        | 3.8B    | 16.9AB  | 23.1A    | 31.2A   | 15.4AB  | 25.3A   | 19.6AB   | 4.9B    | 6.7B   | 19.3AB   | 19.3AB   | 19.2AB   | 13.6AB  | 19.1AB   |
| <b>Ala</b>        | 54.1BC  | 87.1B   | 133.8AB  | 173.6A  | 93.1B   | 149.7A  | 162.7A   | 23.1C   | 28.2C  | 74.6B    | 73.2B    | 72.4B    | 52.9BC  | 67.4B    |
| <b>Cys</b>        | 20.3B   | 25.9B   | 36.5AB   | 52.4A   | 29.7B   | 58.5A   | 40.6AB   | 6.8C    | 7.5C   | 12.6C    | 0.0      | 13.6C    | 0.0     | 12.9C    |
| <b>Val</b>        | 107.5CD | 240.7B  | 302.3AB  | 337.8A  | 254.8B  | 349.5A  | 284.2B   | 27.9E   | 66.2D  | 170.3C   | 176.4C   | 168.2C   | 124.4CD | 155.6C   |
| <b>Met</b>        | 73.1C   | 104.5B  | 141.1AB  | 174.1A  | 107.3B  | 179.2A  | 69.3C    | 18.0D   | 34.2CD | 87.6C    | 88.4C    | 87.7C    | 46.4CD  | 82.8C    |
| <b>Ile</b>        | 49.0CD  | 130.3B  | 196.3AB  | 249.6A  | 143.9B  | 240.8A  | 191.6AB  | 11.2D   | 82.4C  | 88.3C    | 89.0C    | 87.4C    | 55.5CD  | 83.0C    |
| <b>Leu</b>        | 178.8E  | 359.7C  | 468.4B   | 505.4AB | 384.6C  | 517.8AB | 581.1A   | 283.7D  | 237.5D | 332.9C   | 335.6C   | 334.3C   | 259.0D  | 317.4C   |
| <b>Tyr</b>        | 80.5C   | 91.6C   | 138.8B   | 190.4A  | 117.1B  | 172.1A  | 169.3A   | 39.3D   | 25.9D  | 66.0CD   | 70.6CD   | 68.8CD   | 41.7D   | 69.3CD   |
| <b>Phe</b>        | 168.6C  | 259.1B  | 378.7AB  | 428.8A  | 281.1B  | 450.7A  | 385.8AB  | 65.2D   | 77.5D  | 199.3BC  | 195.6BC  | 211.0BC  | 149.0C  | 199.3BC  |
| <b>His</b>        | 60.5C   | 56.9C   | 105.3A   | 113.3A  | 59.4C   | 95.2AB  | 84.4B    | 24.0D   | 19.8D  | 48.9C    | 50.3C    | 51.6C    | 39.0CD  | 46.8C    |
| <b>Trp</b>        | 17.7C   | 60.3B   | 84.1AB   | 101.9A  | 60.2B   | 106.7A  | 80.6AB   | 11.8C   | 13.5C  | 45.1BC   | 51.4BC   | 51.3BC   | 30.5BC  | 48.8BC   |
| <b>Lys</b>        | 101.6BC | 146.5B  | 216.6A   | 280.7A  | 180.9AB | 248.0A  | 227.6A   | 35.9C   | 51.0C  | 99.6BC   | 105.9BC  | 117.1BC  | 75.0C   | 104.5BC  |
| <b>Arg</b>        | 126.6A  | 37.4C   | 34.4C    | 54.3BC  | 27.1C   | 37.0C   | 36.6C    | 71.1B   | 3.8D   | 7.9D     | 8.6D     | 8.9D     | 6.8D    | 9.4D     |
| <b>Pro</b>        | 88.8D   | 186.1C  | 298.2B   | 345.7A  | 221.6B  | 354.9A  | 263.8B   | 120.9CD | 182.4C | 164.9C   | 174.5C   | 176.3C   | 137.7C  | 163.8C   |
| <b>Total</b>      | 1316.1C | 2277.0B | 3184.5AB | 3805.1A | 2387.2B | 3770.4A | 3080.4AB | 831.5D  | 1014.9 | 1947.4BC | 1973.9BC | 1991.5BC | 1439.6C | 1867.9BC |
| <b>GABA</b>       | 138.1B  | 72.0BC  | 102.2B   | 98.2B   | 106.0B  | 242.6A  | 27.1CD   | 44.5C   | 17.1D  | 45.9C    | 50.2C    | 49.7C    | 30.7CD  | 44.4C    |
| <b>Orn</b>        | 15.6C   | 34.0AB  | 58.0A    | 62.0A   | 36.7AB  | 68.7A   | 25.3B    | 6.5C    | 10.7C  | 41.1AB   | 47.4AB   | 46.0AB   | 32.4B   | 32.3B    |
| <b>Amm</b>        | 154.3D  | 294.8B  | 409.1A   | 416.4A  | 260.3C  | 395.8A  | 234.5C   | 101.3D  | 133.0D | 276.4BC  | 308.7B   | 273.4BC  | 239.1C  | 239.9C   |

| 10 days of ripening |         |         |          |         |         |         |         |         |         |          |         |          |         |         |
|---------------------|---------|---------|----------|---------|---------|---------|---------|---------|---------|----------|---------|----------|---------|---------|
| FAA                 | CCs     | ATTs    | LLs      | VCs     | SEs     | BXs     | MIXs    | CCc     | ATTc    | LLc      | VCc     | SEc      | BXc     | MIXc    |
| <b>Asp</b>          | 59.4B   | 65.5AB  | 80.5A    | 64.6AB  | 56.2AB  | 65.1AB  | 65.7AB  | 20.7C   | 84.7A   | 90.8A    | 96.7A   | 85.5A    | 78.4A   | 95.9A   |
| <b>Thr</b>          | 26.1C   | 66.6BC  | 86.8B    | 75.7BC  | 68.6BC  | 63.7BC  | 56.3BC  | 18.9C   | 92.5B   | 104.2AB  | 112.1AB | 100.2AB  | 89.2B   | 120.1A  |
| <b>Ser</b>          | 185.7D  | 253.0C  | 319.9B   | 286.5C  | 254.6C  | 252.1C  | 258.6C  | 167.5D  | 388.4AB | 433.5A   | 458.9A  | 408.4AB  | 385.1AB | 451.1A  |
| <b>Glu</b>          | 230.0D  | 345.4C  | 403.5B   | 363.4C  | 332.2C  | 508.9A  | 462.2B  | 83.7E   | 381.3C  | 402.3B   | 417.5B  | 395.2C   | 378.3C  | 438.1B  |
| <b>Gly</b>          | 15.9C   | 35.9BC  | 44.3B    | 40.5B   | 40.0B   | 37.2B   | 48.9B   | 33.0BC  | 73.3AB  | 71.9AB   | 77.9AB  | 75.4AB   | 70.2AB  | 85.5A   |
| <b>Ala</b>          | 57.6C   | 91.1B   | 115.6AB  | 94.8B   | 83.6B   | 89.6B   | 82.9B   | 62.7BC  | 115.5AB | 123.0AB  | 127.6AB | 119.8AB  | 116.0AB | 141.6A  |
| <b>Cys</b>          | 29.8B   | 40.9AB  | 51.0A    | 40.2AB  | 30.2B   | 43.5AB  | 29.6B   | 13.5C   | 22.9B   | 22.1B    | 23.7B   | 24.7B    | 22.2B   | 24.2B   |
| <b>Val</b>          | 185.8BC | 274.6A  | 314.2A   | 286.9A  | 221.1B  | 290.5A  | 271.1AB | 108.9C  | 238.0AB | 250.9AB  | 257.8AB | 243.8AB  | 239.6AB | 269.1AB |
| <b>Met</b>          | 75.3B   | 121.5AB | 153.3AB  | 129.1AB | 102.1B  | 124.4AB | 154.4AB | 95.6B   | 168.3A  | 175.9A   | 189.2A  | 181.7A   | 164.8A  | 190.3A  |
| <b>Ile</b>          | 67.9C   | 178.1AB | 219.8A   | 174.9AB | 124.9B  | 168.4AB | 132.7B  | 40.3BC  | 127.8B  | 142.8AB  | 159.7AB | 141.2AB  | 128.4B  | 159.4AB |
| <b>Leu</b>          | 221.5C  | 441.7AB | 487.5AB  | 458.8AB | 392.8B  | 460.9AB | 447.1AB | 289.9BC | 480.4A  | 489.2A   | 510.6A  | 498.4A   | 473.2A  | 512.4A  |
| <b>Tyr</b>          | 87.3AB  | 94.6A   | 103.2A   | 74.4C   | 41.0D   | 95.1A   | 73.0C   | 94.5A   | 64.3C   | 75.2C    | 88.3AB  | 74.1C    | 63.9C   | 69.7C   |
| <b>Phe</b>          | 205.3C  | 351.4B  | 413.9AB  | 376.3B  | 289.0BC | 389.7AB | 359.2B  | 243.9C  | 417.9AB | 433.4A   | 448.6A  | 431.3AAB | 407.9AB | 450.9A  |
| <b>His</b>          | 90.1B   | 100.6AB | 130.8A   | 89.1B   | 73.1BC  | 100.6AB | 93.5B   | 60.7C   | 76.3BC  | 77.5BC   | 81.5B   | 75.1BC   | 77.4BC  | 84.5B   |
| <b>Trp</b>          | 55.2B   | 75.0AB  | 94.1A    | 85.5AB  | 54.2B   | 91.2A   | 85.6AB  | 52.9B   | 78.5AB  | 67.0AB   | 87.2AB  | 85.1AB   | 76.1AB  | 83.4A   |
| <b>Lys</b>          | 156.4B  | 219.0AB | 260.1A   | 211.1AB | 168.8B  | 196.3AB | 171.9B  | 89.8C   | 155.8B  | 179.9AB  | 184.4AB | 168.6AB  | 157.5B  | 203.9AB |
| <b>Arg</b>          | 142.3B  | 49.4C   | 67.1BC   | 36.8C   | 29.9C   | 57.1BC  | 60.4BC  | 201.8A  | 39.1C   | 38.6C    | 39.5C   | 35.0C    | 40.4C   | 40.4C   |
| <b>Pro</b>          | 57.4D   | 238.6AB | 273.0AB  | 243.5AB | 211.4B  | 222.4B  | 148.1C  | 70.4D   | 273.8AB | 297.2AB  | 304.1A  | 285.4AB  | 262.2AB | 328.5A  |
| <b>Total</b>        | 1949.0D | 3043.0B | 3618.5AB | 3132.2B | 2573.7C | 3256.6B | 3051.4B | 1748.5D | 3278.9B | 3475.4AB | 3665.3A | 3428.9AB | 3230.9B | 3748.9A |
| <b>GABA</b>         | 164.0AB | 178.7AB | 274.1A   | 183.6AB | 100.0B  | 205.7A  | 230.0A  | 178.1AB | 143.7AB | 124.5B   | 136.2AB | 145.8AB  | 122.7AB | 132.8AB |
| <b>Orn</b>          | 18.8C   | 39.4B   | 49.7B    | 58.1B   | 44.5B   | 57.5B   | 42.8B   | 16.2C   | 76.2AB  | 64.2AB   | 80.8AB  | 81.5AB   | 68.6AB  | 92.5A   |
| <b>Amm</b>          | 94.2C   | 185.5B  | 224.3B   | 194.2B  | 206.0B  | 174.9B  | 169.8B  | 155.4B  | 317.7AB | 329.8AB  | 328.4AB | 339.9AB  | 311.1AB | 385.4A  |

20 days of ripening

| FAA   | CCs     | ATTs    | LLs     | VCs     | SEs      | BXs     | MIXs     | CCc     | ATTc    | LLc     | VCc      | SEc      | BXc     | MIXc    |
|-------|---------|---------|---------|---------|----------|---------|----------|---------|---------|---------|----------|----------|---------|---------|
| Asp   | 44.6BC  | 37.1BC  | 74.2AB  | 50.6B   | 38.8BC   | 13.5C   | 53.8B    | 26.4BC  | 87.7AB  | 102.1A  | 71.0AB   | 103.9A   | 37.5BC  | 85.4AB  |
| Thr   | 68.5A   | 35.6B   | 37.6B   | 48.8AB  | 71.9A    | 12.6C   | 74.9A    | 34.4B   | 69.6A   | 83.8A   | 74.6A    | 73.5A    | 36.4B   | 86.2A   |
| Ser   | 696.4CD | 677.3CD | 1052.0C | 1049.4C | 1221.4BC | 402.2D  | 1471.9BC | 865.7CD | 1831.1B | 2369.5A | 2110.8AB | 2009.8AB | 1025.2C | 2421.3A |
| Glu   | 518.2A  | 473.0AB | 577.0A  | 514.1A  | 512.0A   | 125.9C  | 550.9A   | 231.0B  | 522.2A  | 612.2A  | 514.1A   | 572.6A   | 285.8B  | 554.0A  |
| Gly   | 4.5B    | 5.0B    | 16.8AB  | 7.2B    | 6.5B     | 4.3B    | 14.1AB   | 5.2B    | 19.9AB  | 34.9A   | 23.9AB   | 19.7AB   | 10.6B   | 32.5A   |
| Ala   | 52.2B   | 49.2B   | 89.3AB  | 65.3B   | 72.1AB   | 48.7B   | 87.2AB   | 48.0B   | 103.0AB | 128.2A  | 114.8AB  | 103.8AB  | 60.8B   | 128.1A  |
| Cys   | 19.3    | 20.5    | 25.7    | 21.7    | 20.9     | 15.4    | 23.5     | 13.6    | 24.4    | 25.0    | 19.7     | 21.3     | 15.2    | 21.8    |
| Val   | 216.8A  | 226.9A  | 278.5A  | 253.2A  | 267.4A   | 263.7A  | 287.3A   | 160.5B  | 241.1A  | 298.2A  | 238.2A   | 253.7A   | 131.1B  | 274.7A  |
| Met   | 101.4AB | 110.3A  | 128.1A  | 127.4A  | 137.6A   | 37.6B   | 145.1A   | 61.9B   | 129.6A  | 155.0A  | 125.4A   | 132.7A   | 60.2B   | 144.3A  |
| Ile   | 91.2AB  | 115.4AB | 139.2A  | 130.3A  | 148.9A   | 25.8B   | 166.3A   | 37.6B   | 136.2A  | 174.7A  | 146.0A   | 147.5A   | 71.3AB  | 175.0A  |
| Leu   | 364.4C  | 422.8B  | 488.6AB | 470.3B  | 488.5AB  | 458.0B  | 518.2AB  | 199.8D  | 527.9AB | 618.7A  | 507.3AB  | 559.6AB  | 284.8CD | 582.9A  |
| Tyr   | 100.6AB | 92.0BC  | 102.0AB | 111.7AB | 126.4A   | 75.4BC  | 119.8A   | 82.2B   | 107.9AB | 103.7AB | 112.2AB  | 113.1AB  | 60.4C   | 124.7A  |
| Phe   | 161.7B  | 236.9AB | 289.4A  | 298.0A  | 291.2A   | 124.9B  | 307.3A   | 123.2B  | 283.8AB | 331.8A  | 238.3AB  | 275.2AB  | 141.1B  | 297.8A  |
| His   | 13.7C   | 20.5BC  | 48.8AB  | 30.9B   | 21.7B    | 34.0B   | 50.3AB   | 29.9B   | 73.0A   | 79.6A   | 66.6A    | 79.5A    | 47.9AB  | 56.1AB  |
| Trp   | 27.4B   | 63.5AB  | 68.6AB  | 80.1A   | 75.7A    | 30.7B   | 76.7A    | 27.0C   | 45.7AB  | 80.8A   | 54.9AB   | 65.3AB   | 32.7AB  | 75.6A   |
| Lys   | 29.0C   | 29.3C   | 96.1B   | 43.1BC  | 50.9BC   | 90.7B   | 117.5AB  | 82.2BC  | 60.6BC  | 131.3AB | 113.8AB  | 78.7BC   | 66.4BC  | 161.3A  |
| Arg   | 4.7     | 1.9     | 5.1     | 5.8     | 9.7      | 106.0   | 7.7      | 1.1     | 10.3    | 8.8     | 16.0     | 12.4     | 6.9     | 14.6    |
| Pro   | 121.2B  | 284.1AB | 279.1AB | 288.0AB | 319.7A   | 383.0A  | 339.3A   | 74.4C   | 245.0AB | 302.5AB | 228.7AB  | 233.3AB  | 125.4B  | 276.8AB |
| Total | 2636.0D | 2901.2D | 3796.2C | 3596.0C | 3881.1   | 3442.3C | 4412.0B  | 2104.2D | 4497.9B | 5640.8A | 4776.1B  | 4855.5B  | 2499.7D | 5513.2A |
| GABA  | 147.7B  | 225.0A  | 145.1B  | 136.4B  | 136.8B   | 132.9B  | 141.0B   | 197.6AB | 166.6AB | 131.6B  | 158.0AB  | 151.8AB  | 139.3B  | 134.2B  |
| Orn   | 24.4B   | 29.0B   | 53.2AB  | 35.8B   | 41.8AB   | 9.0C    | 59.0AB   | 4.4C    | 65.1AB  | 91.4A   | 55.2AB   | 66.5AB   | 34.9B   | 74.9AB  |
| Amm   | 156.6A  | 142.6AB | 170.1A  | 162.2A  | 159.1A   | 66.1C   | 164.8A   | 61.3C   | 162.8A  | 180.3A  | 153.4A   | 169.6A   | 105.1B  | 166.8A  |

29

30

| 30 days of ripening |         |         |         |          |          |         |          |         |         |         |          |          |         |          |
|---------------------|---------|---------|---------|----------|----------|---------|----------|---------|---------|---------|----------|----------|---------|----------|
| FAA                 | CCs     | ATTs    | LLs     | VCs      | SEs      | BXs     | MIXs     | CCc     | ATTc    | LLc     | VCc      | SEc      | BXc     | MIXc     |
| <b>Asp</b>          | 89.6BC  | 166.6A  | 126.9AB | 134.1AB  | 152.9A   | 133.9AB | 112.0AB  | 46.2C   | 90.3BC  | 80.0BC  | 112.2AB  | 86.9BC   | 105.6B  | 105.5B   |
| <b>Thr</b>          | 98.2B   | 148.4A  | 162.2A  | 138.4AB  | 126.1AB  | 107.9AB | 172.2A   | 88.1B   | 106.5AB | 100.5AB | 120.8AB  | 99.8AB   | 115.1AB | 99.5AB   |
| <b>Ser</b>          | 170.3C  | 306.4B  | 405.6A  | 348.5AB  | 311.0B   | 271.7BC | 390.3AB  | 165.6C  | 323.0AB | 289.5AB | 361.7AB  | 296.8AB  | 339.9AB | 389.4AB  |
| <b>Glu</b>          | 141.5C  | 112.3C  | 450.8A  | 377.5A   | 346.1AB  | 318.0AB | 396.5A   | 134.0C  | 299.4AB | 261.0B  | 330.2AB  | 265.7B   | 311.2AB | 251.7B   |
| <b>Gly</b>          | 46.4AB  | 103.9A  | 63.8AB  | 50.7AB   | 51.1AB   | 51.0AB  | 62.3AB   | 33.5B   | 58.6AB  | 55.9AB  | 64.0AB   | 55.5AB   | 65.1AB  | 54.1AB   |
| <b>Ala</b>          | 151.3B  | 317.1A  | 219.0AB | 184.6AB  | 167.8AB  | 164.9AB | 201.3AB  | 85.8C   | 139.2B  | 122.7B  | 147.4AB  | 122.2B   | 146.3AB | 115.5B   |
| <b>Cys</b>          | 46.3BC  | 178.0A  | 92.3B   | 70.2AB   | 84.4AB   | 75.4AB  | 58.7AB   | 23.5C   | 30.1C   | 25.7C   | 31.2C    | 27.9C    | 36.1BC  | 25.9C    |
| <b>Val</b>          | 202.0B  | 377.3AB | 487.2A  | 482.6A   | 448.1A   | 454.2A  | 457.7A   | 198.8B  | 303.3AB | 256.5B  | 323.8AB  | 262.0B   | 313.9AB | 244.7B   |
| <b>Met</b>          | 174.7BC | 426.8A  | 302.7AB | 269.6B   | 250.1B   | 234.2B  | 252.6B   | 152.7C  | 223.4B  | 174.2BC | 236.3B   | 187.7BC  | 235.5B  | 271.7B   |
| <b>Ile</b>          | 191.0C  | 430.9A  | 431.8A  | 390.3AB  | 351.6B   | 336.5B  | 370.0B   | 126.5D  | 185.4C  | 151.4BC | 201.8C   | 158.4BC  | 185.6C  | 147.8BC  |
| <b>Leu</b>          | 525.8CD | 637.5C  | 1000.1A | 926.1AB  | 887.2B   | 859.6B  | 870.9B   | 327.5D  | 769.2BC | 640.3C  | 818.5B   | 681.6BC  | 758.6BC | 631.3C   |
| <b>Tyr</b>          | 90.0B   | 99.4B   | 131.6AB | 177.9A   | 195.0A   | 194.8A  | 158.3AB  | 179.9   | 103.4B  | 64.8C   | 109.5B   | 73.9C    | 80.3BC  | 70.2C    |
| <b>Phe</b>          | 344.0D  | 364.3D  | 846.3A  | 709.4AB  | 666.4B   | 650.0B  | 644.0B   | 272.6E  | 510.5C  | 397.3D  | 560.4C   | 432.6CD  | 514.3C  | 594.2C   |
| <b>His</b>          | 91.8B   | 85.4BC  | 160.9A  | 179.6A   | 64.9C    | 143.9AB | 120.1AB  | 109.9B  | 102.7B  | 82.0BC  | 109.0B   | 91.2B    | 106.2B  | 81.9BC   |
| <b>Trp</b>          | 65.5C   | 126.4AB | 191.6A  | 128.3AB  | 158.5AB  | 152.4AB | 133.9AB  | 85.8BC  | 106.1B  | 66.6C   | 111.5B   | 87.9BC   | 107.8B  | 72.7C    |
| <b>Lys</b>          | 240.6B  | 444.3A  | 273.3B  | 431.5A   | 411.2AB  | 394.2AB | 459.6A   | 134.8C  | 213.1B  | 188.6BC | 229.9B   | 192.3BC  | 221.2B  | 187.6BC  |
| <b>Arg</b>          | 77.9AB  | 57.3B   | 19.4C   | 66.7AB   | 97.6A    | 89.2A   | 88.7A    | 39.6BC  | 43.0BC  | 36.0BC  | 38.9BC   | 40.4BC   | 47.0BC  | 57.3AB   |
| <b>Pro</b>          | 170.6CD | 248.7C  | 506.2A  | 427.8B   | 378.7BC  | 353.9BC | 430.7B   | 54.7D   | 352.3BC | 294.2C  | 367.8BC  | 302.7C   | 351.2BC | 294.3C   |
| <b>Total</b>        | 2917.4D | 4100.9C | 5871.5A | 5493.8AB | 5148.7AB | 4985.5B | 5379.9AB | 2259.5E | 3959.5C | 3287.2D | 4274.7BC | 3465.6BC | 4040.9C | 3695.1BC |
| <b>GABA</b>         | 97.8C   | 473.8A  | 155.1BC | 127.3C   | 149.1BC  | 127.0C  | 121.9C   | 271.3B  | 158.6BC | 125.5C  | 182.9BC  | 147.0BC  | 170.2BC | 133.1C   |
| <b>Orn</b>          | 15.7C   | 191.2A  | 158.7AB | 91.7B    | 86.7B    | 97.5B   | 82.5B    | 29.5C   | 7.1C    | 57.4BC  | 103.7B   | 71.9BC   | 92.3B   | 1.9C     |
| <b>Amm</b>          | 55.5B   | 233.7A  | 229.9A  | 185.0AB  | 160.0AB  | 161.7AB | 174.2AB  | 78.3B   | 166.2AB | 158.8AB | 190.0AB  | 151.0AB  | 174.7AB | 153.9AB  |

31 Values represent the average of analysis performed on three samples coming from as many cheese-making experiments. Data in the same row with  
32 different letters (A-E) are significantly different ( $P < 0.05$ ).

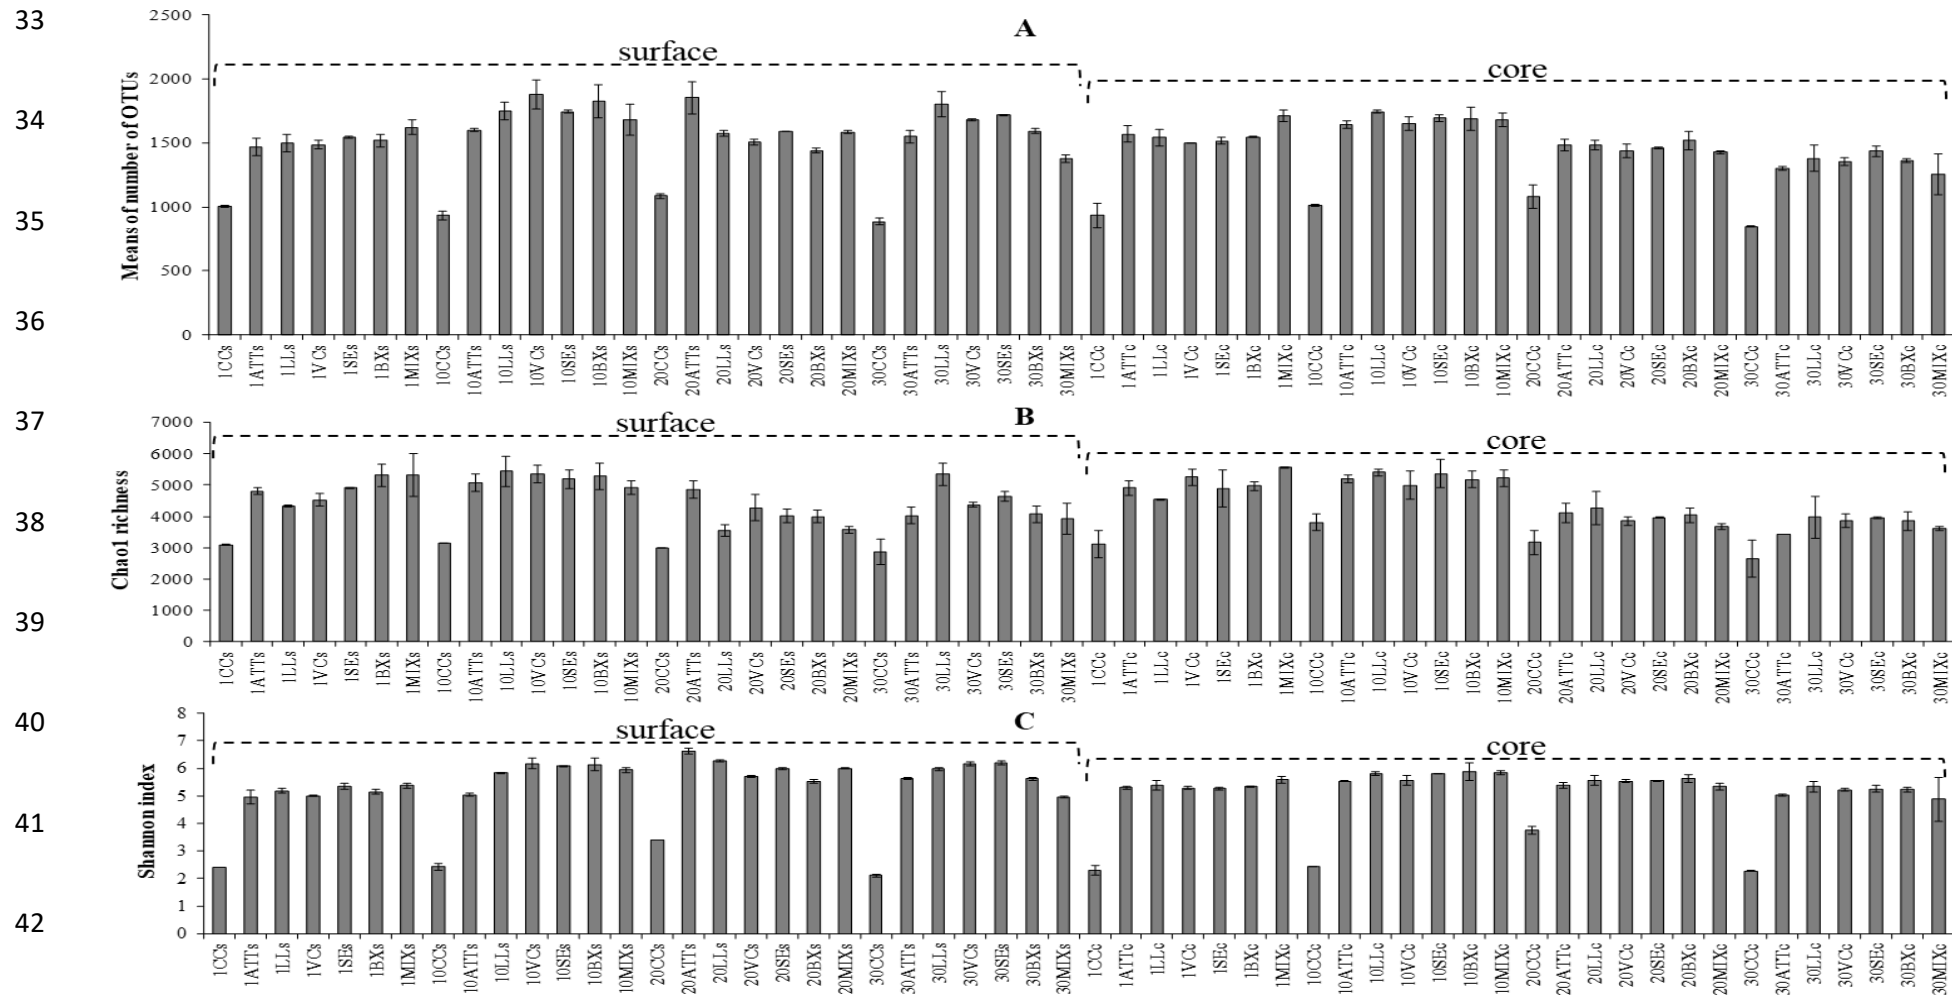

43 **Figure S1.** Number of bacterial Operational Taxonomic Units (OTUs) (A), Chao1 richness (B); and Shannon index (C) found upon 16S metagenetic  
 44 analysis performed using the DNA extracted from surface (s) and core (c) level of control cheese (CC), cheese added of attenuated culture of  
 45 *Lactococcus lactis* subsp. *lactis* CC01 (ATT) and ATT cheeses with the additions, as surface adjunct cultures (2 log CFU/cm<sup>2</sup>), of *Leuconostoc lactis*



46 MC11 (LL), *Vibrio casei* DSM22364 (VC), *Staphylococcus equorum* DSM15097 (SE), *Brochothrix thermosphacta* MC25 (BX) individually or in  
47 mix (MIX) after 1, 10, 20 or 30 days of ripening.

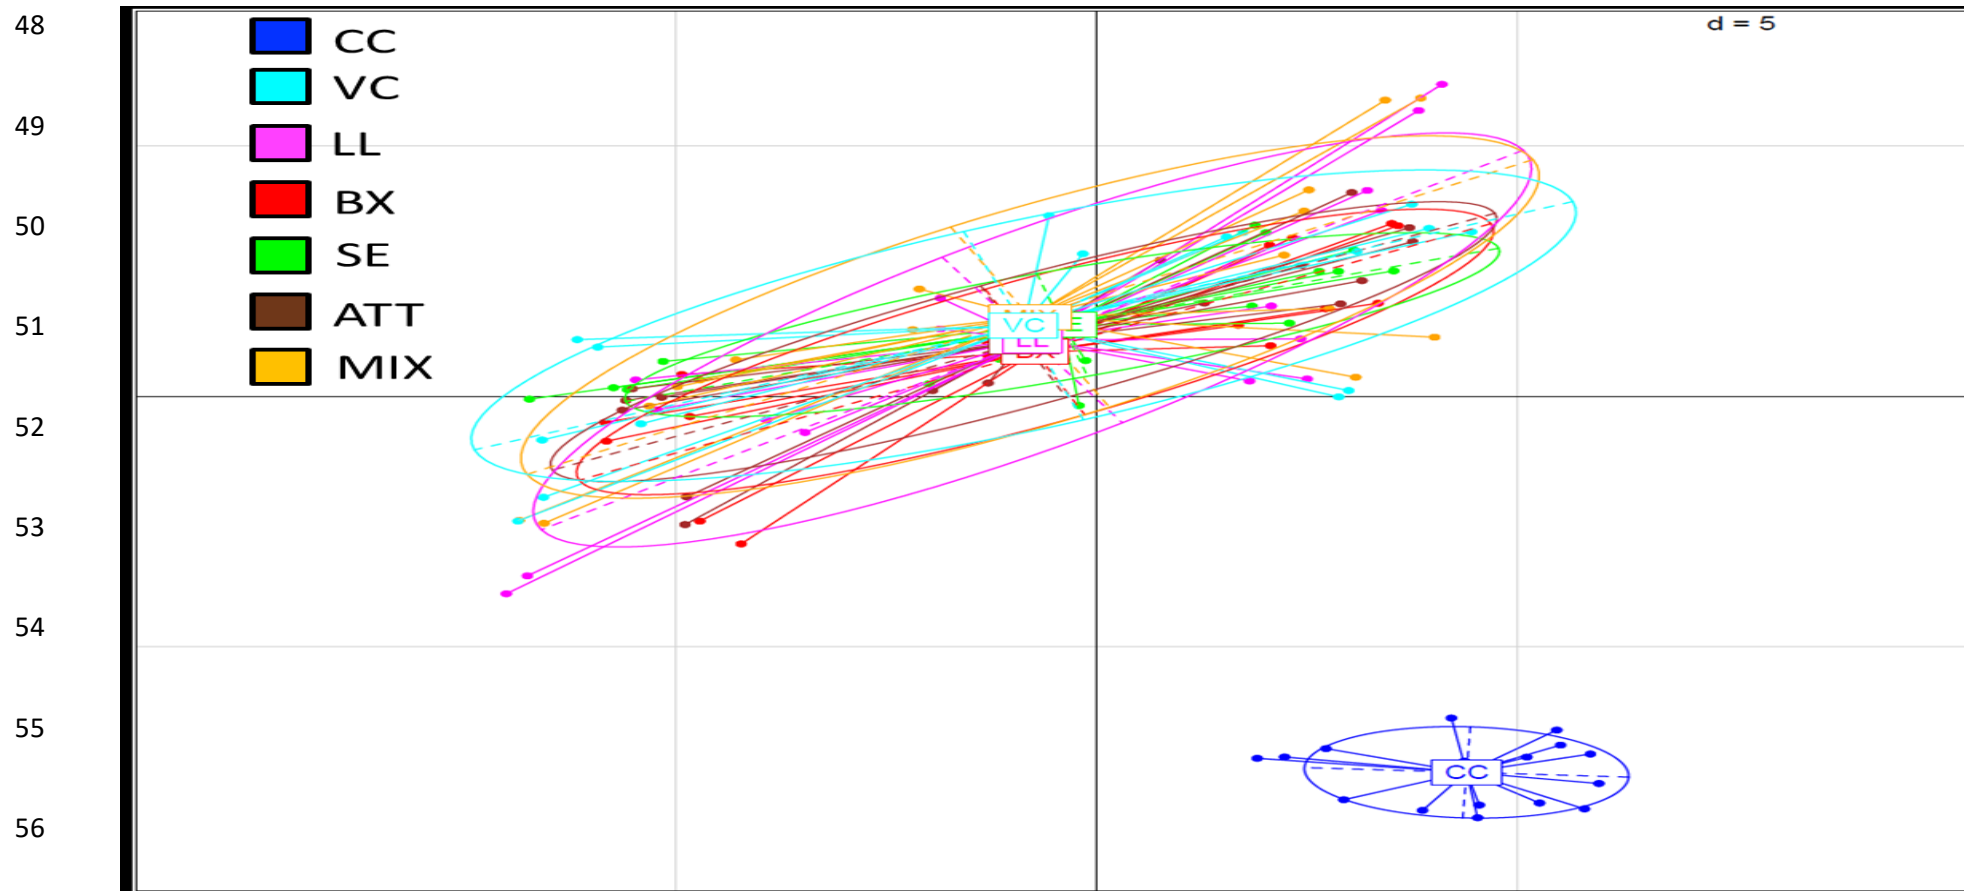

57 **Figure S2.** Principal coordinate analysis (PCoA) based on the unweighted UniFrac distance matrix of all 16 S rRNA gene sequences found upon 16S  
58 metagenetic analysis performed using the DNA extracted from surface (s) and core (c) level of control cheese (CC), cheese added of attenuated culture  
59 of *Lactococcus lactis* subsp. *lactis* CC01 (ATT) and ATT cheeses with the additions, as surface adjunct cultures (2 log CFU/cm<sup>2</sup>), of *Leuconostoc*

60 *lactis* MC11 (LL), *Vibrio casei* DSM22364 (VC), *Staphylococcus equorum* DSM15097 (SE), *Brochothrix thermosphacta* MC25 (BX) individually  
61 or in mix (MIX) during ripening.

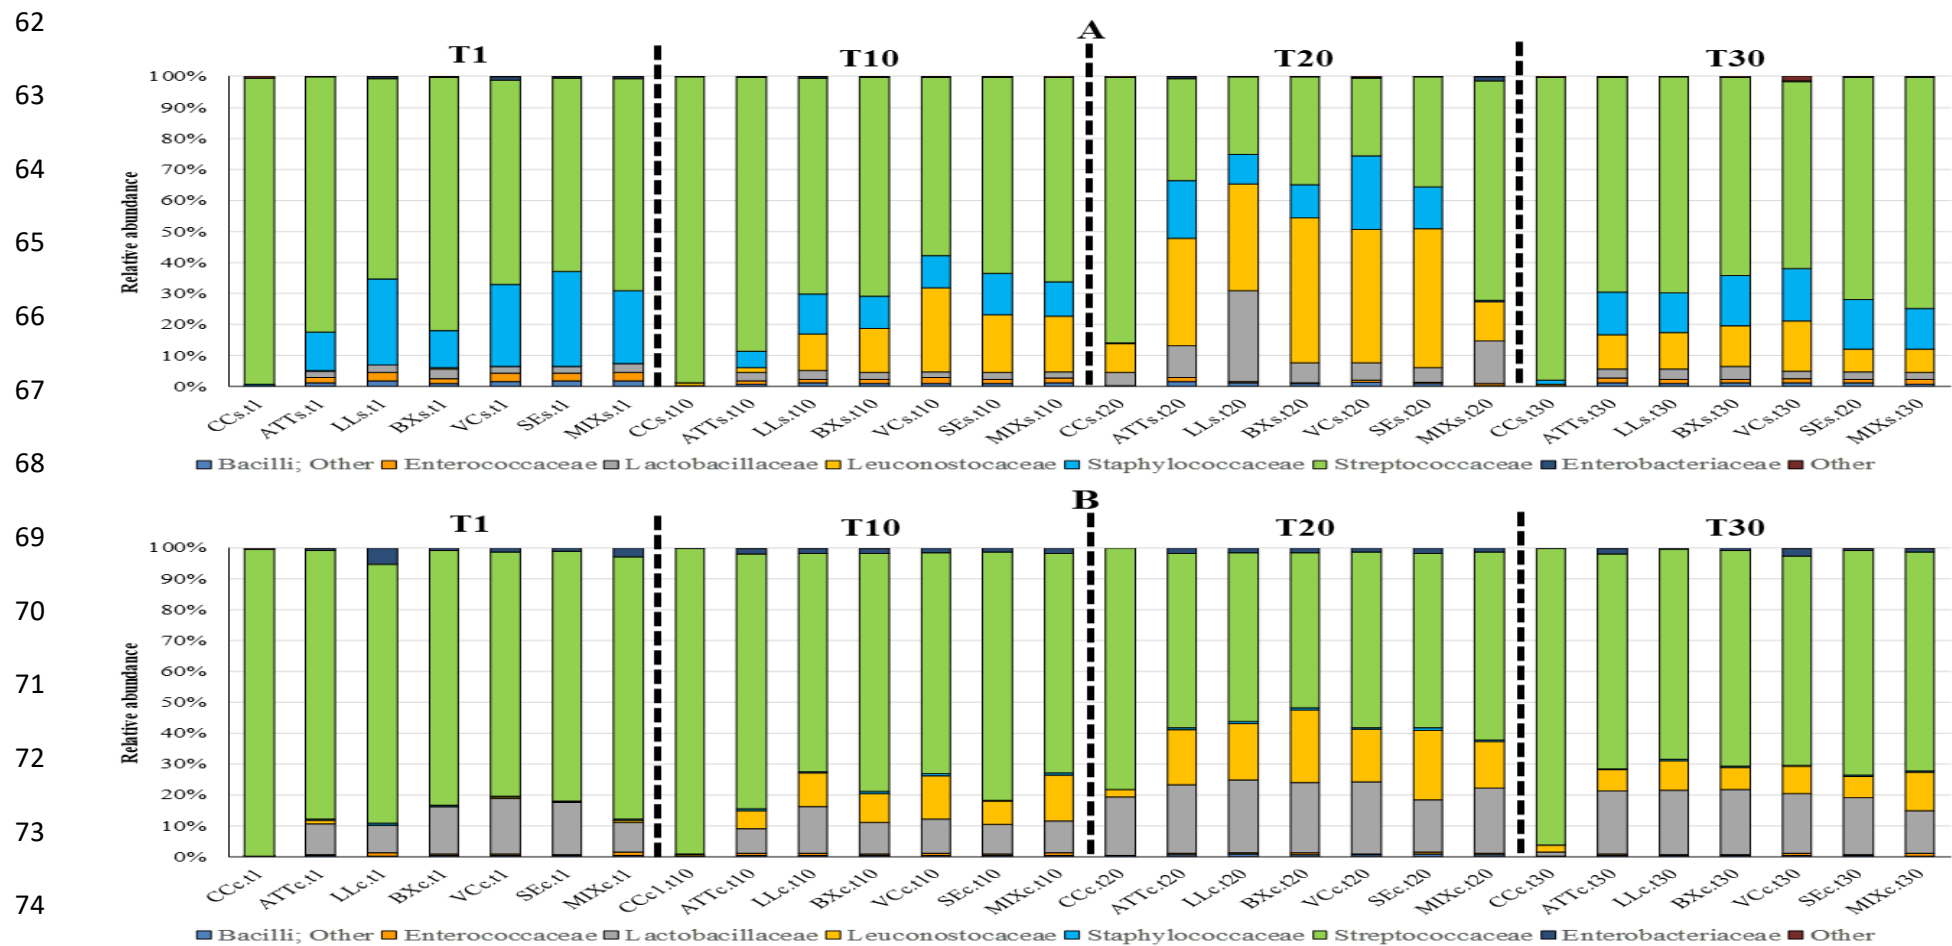

75 **Figure S3.** Relative abundance (percent) of total bacteria (family level) found after 1 (T1), 10 (T10), 20 (T20) or 30 (T30) days of ripening in surface  
 76 (A) and core (B) of control cheese (CC), cheese added of attenuated culture of *Lactococcus lactis* subsp. *lactis* CC01 (ATT) and ATT cheeses with the  
 77 additions, as surface adjunct cultures ( $2 \log \text{CFU}/\text{cm}^2$ ), of *Leuconostoc lactis* MC11 (LL), *Vibrio casei* DSM22364 (VC), *Staphylococcus equorum*  
 78 DSM15097 (SE), *Brochothrix thermosphacta* MC25 (BX) individually or in mix (MIX).

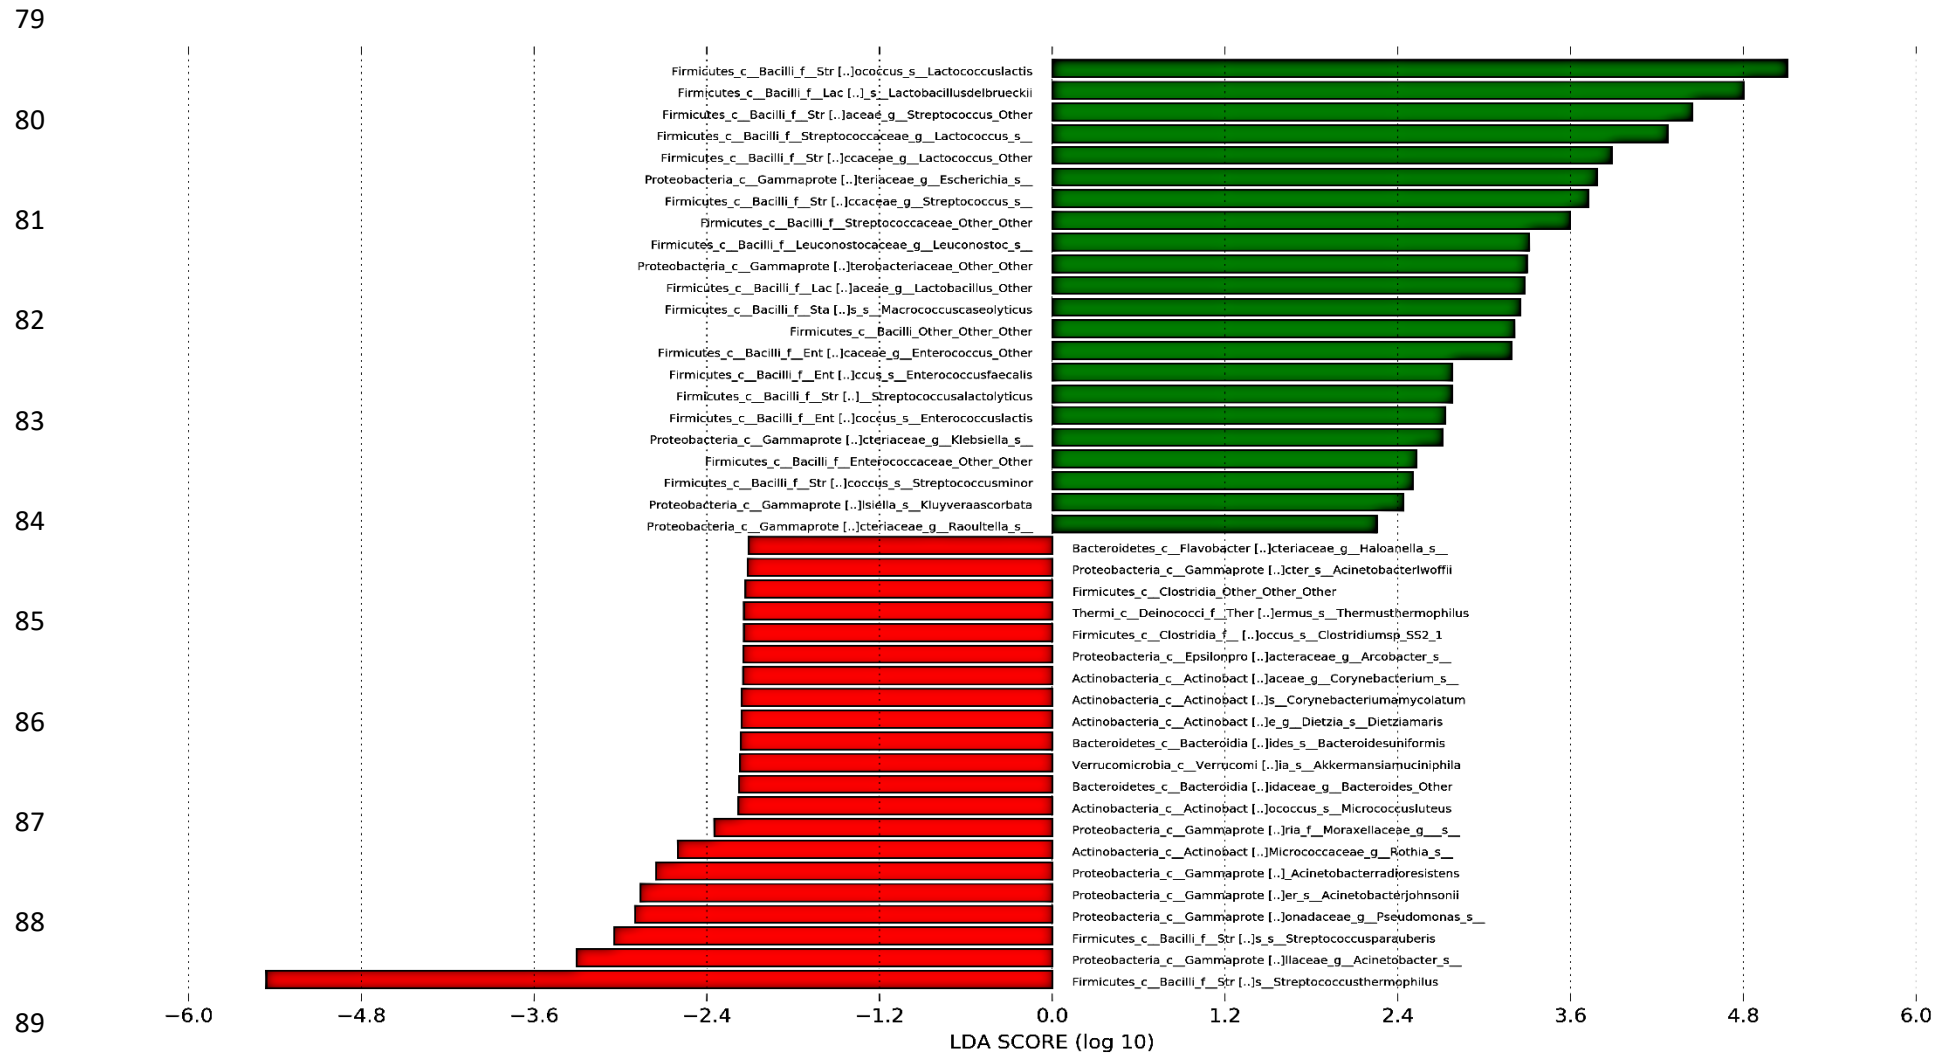

90 **Figure S4.** LEfSe analysis of the microbial communities found, after 1 day of ripening, in the rind of control cheese (CC, in red) and the group of  
 91 cheeses (ATT, LL, VC, SE, BX, MIX, in green) added of attenuated culture of *Lactococcus lactis* subsp. *lactis* CC1.

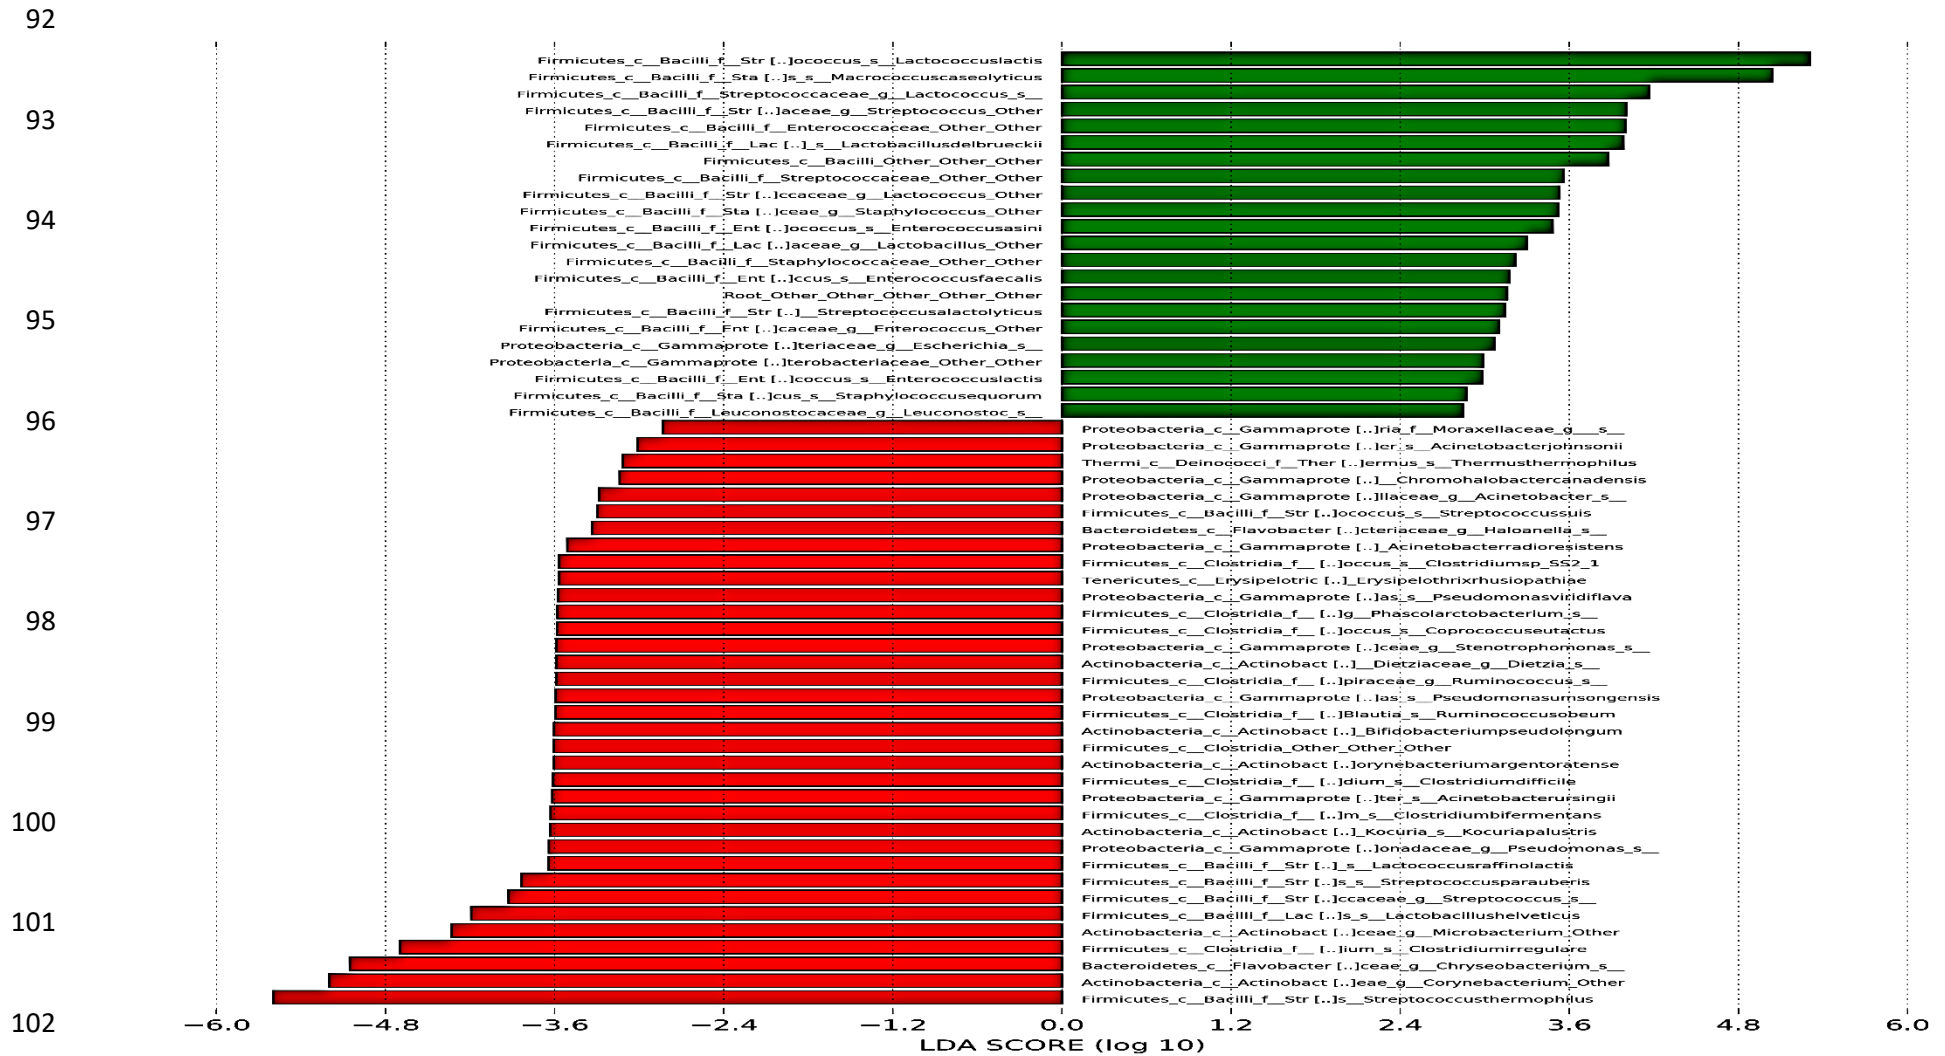

103 **Figure S5.** LEfSe analysis of the microbial communities found, after 1 day of ripening, in the core of control cheese (CC, in red) and the group of  
 104 cheeses (ATT, LL, VC, SE, BX, MIX, in green) added of attenuated culture of *Lactococcus lactis* subsp. *lactis* CC1.

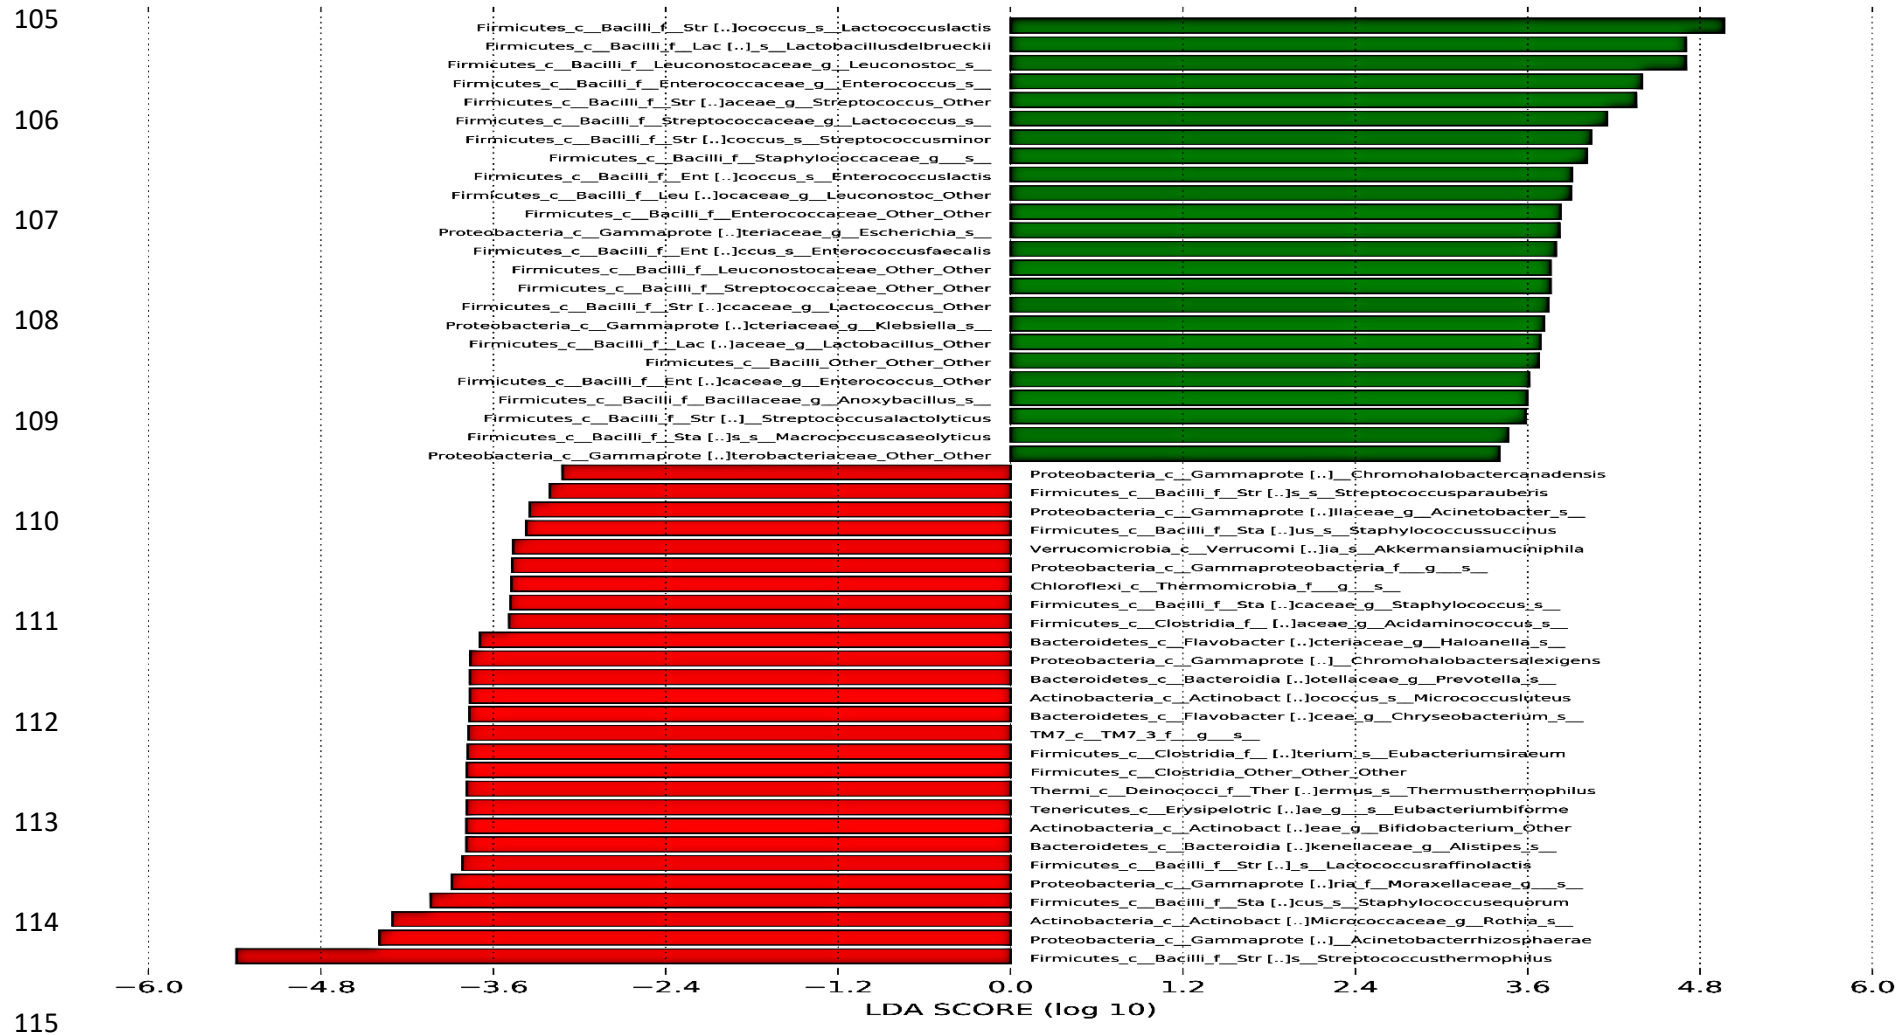

116 **Figure S6.** LEfSe analysis of the microbial communities found, after 10 day of ripening, in the rind of control cheese (CC, in red) and the group of  
 117 cheeses (ATT, LL, VC, SE, BX, MIX, in green) added of attenuated culture of *Lactococcus lactis* subsp. *lactis* CC1.

118

119

120

121

122

123

124

125

126

127

128

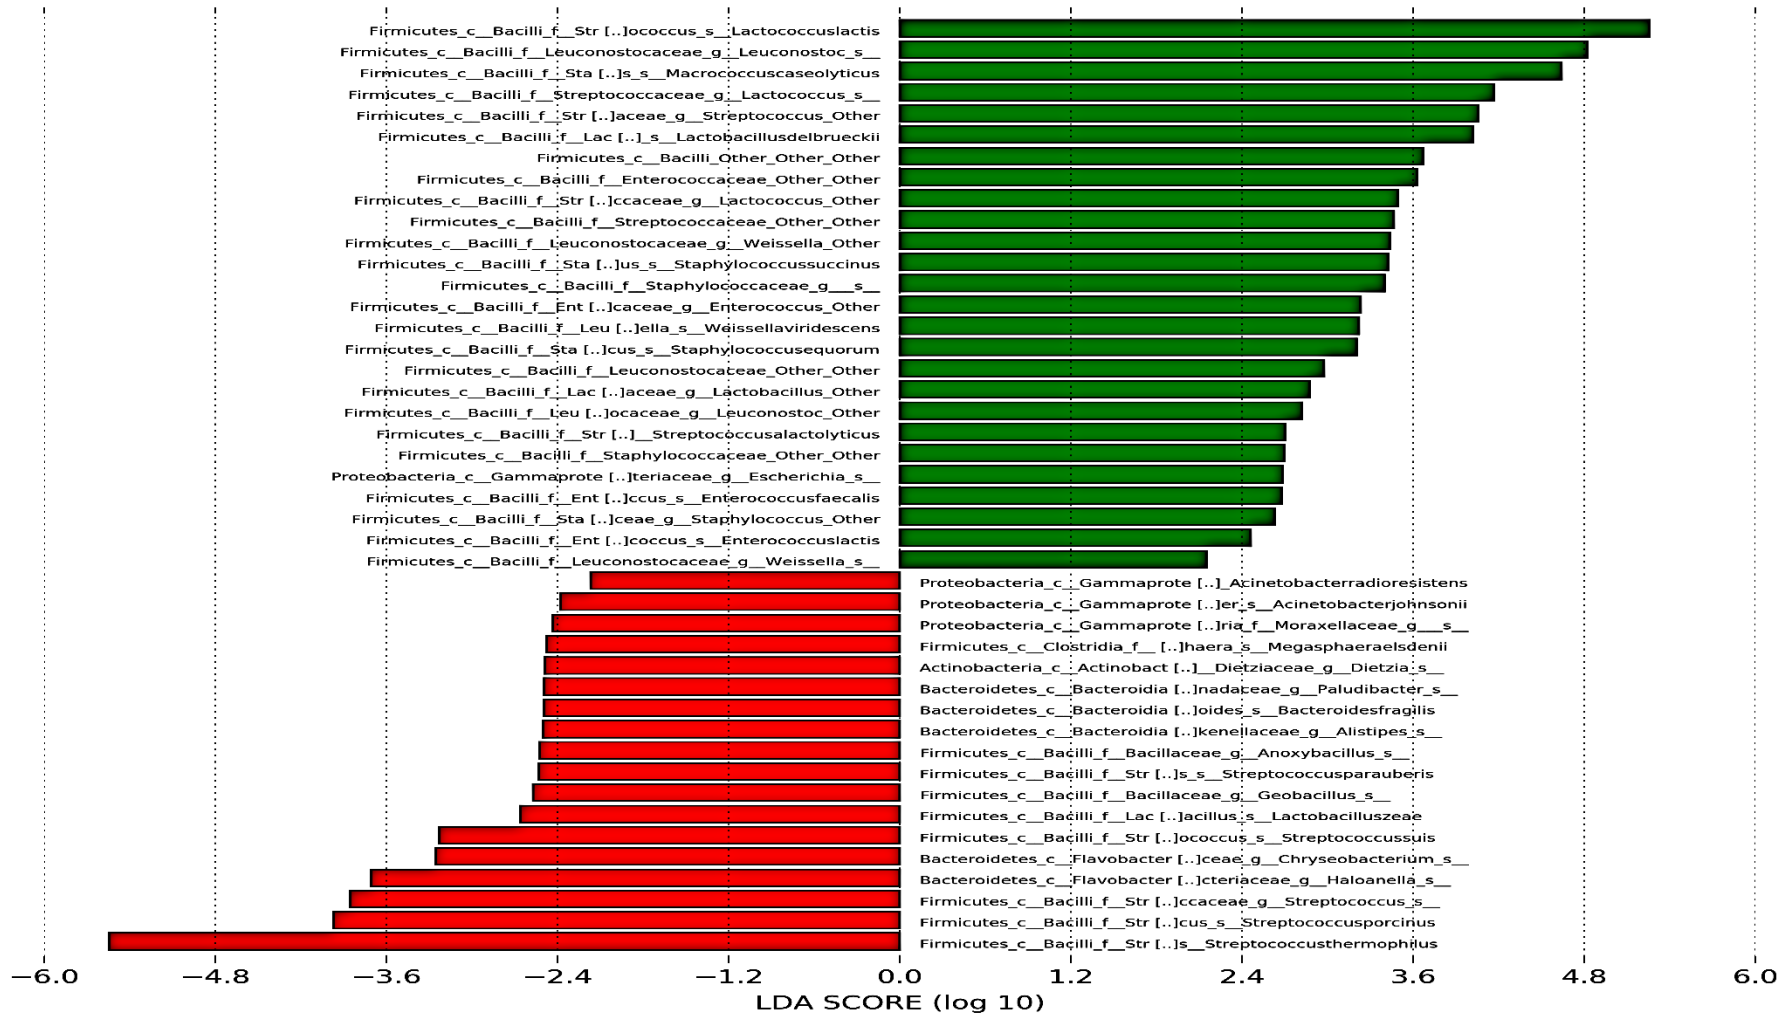

129 **Figure S7.** LEfSe analysis of the microbial communities found, after 10 day of ripening, in the core of control cheese (CC, in red) and the group of

130 cheeses (ATT, LL, VC, SE, BX, MIX, in green) added of attenuated culture of *Lactococcus lactis* subsp. *lactis* CC1.

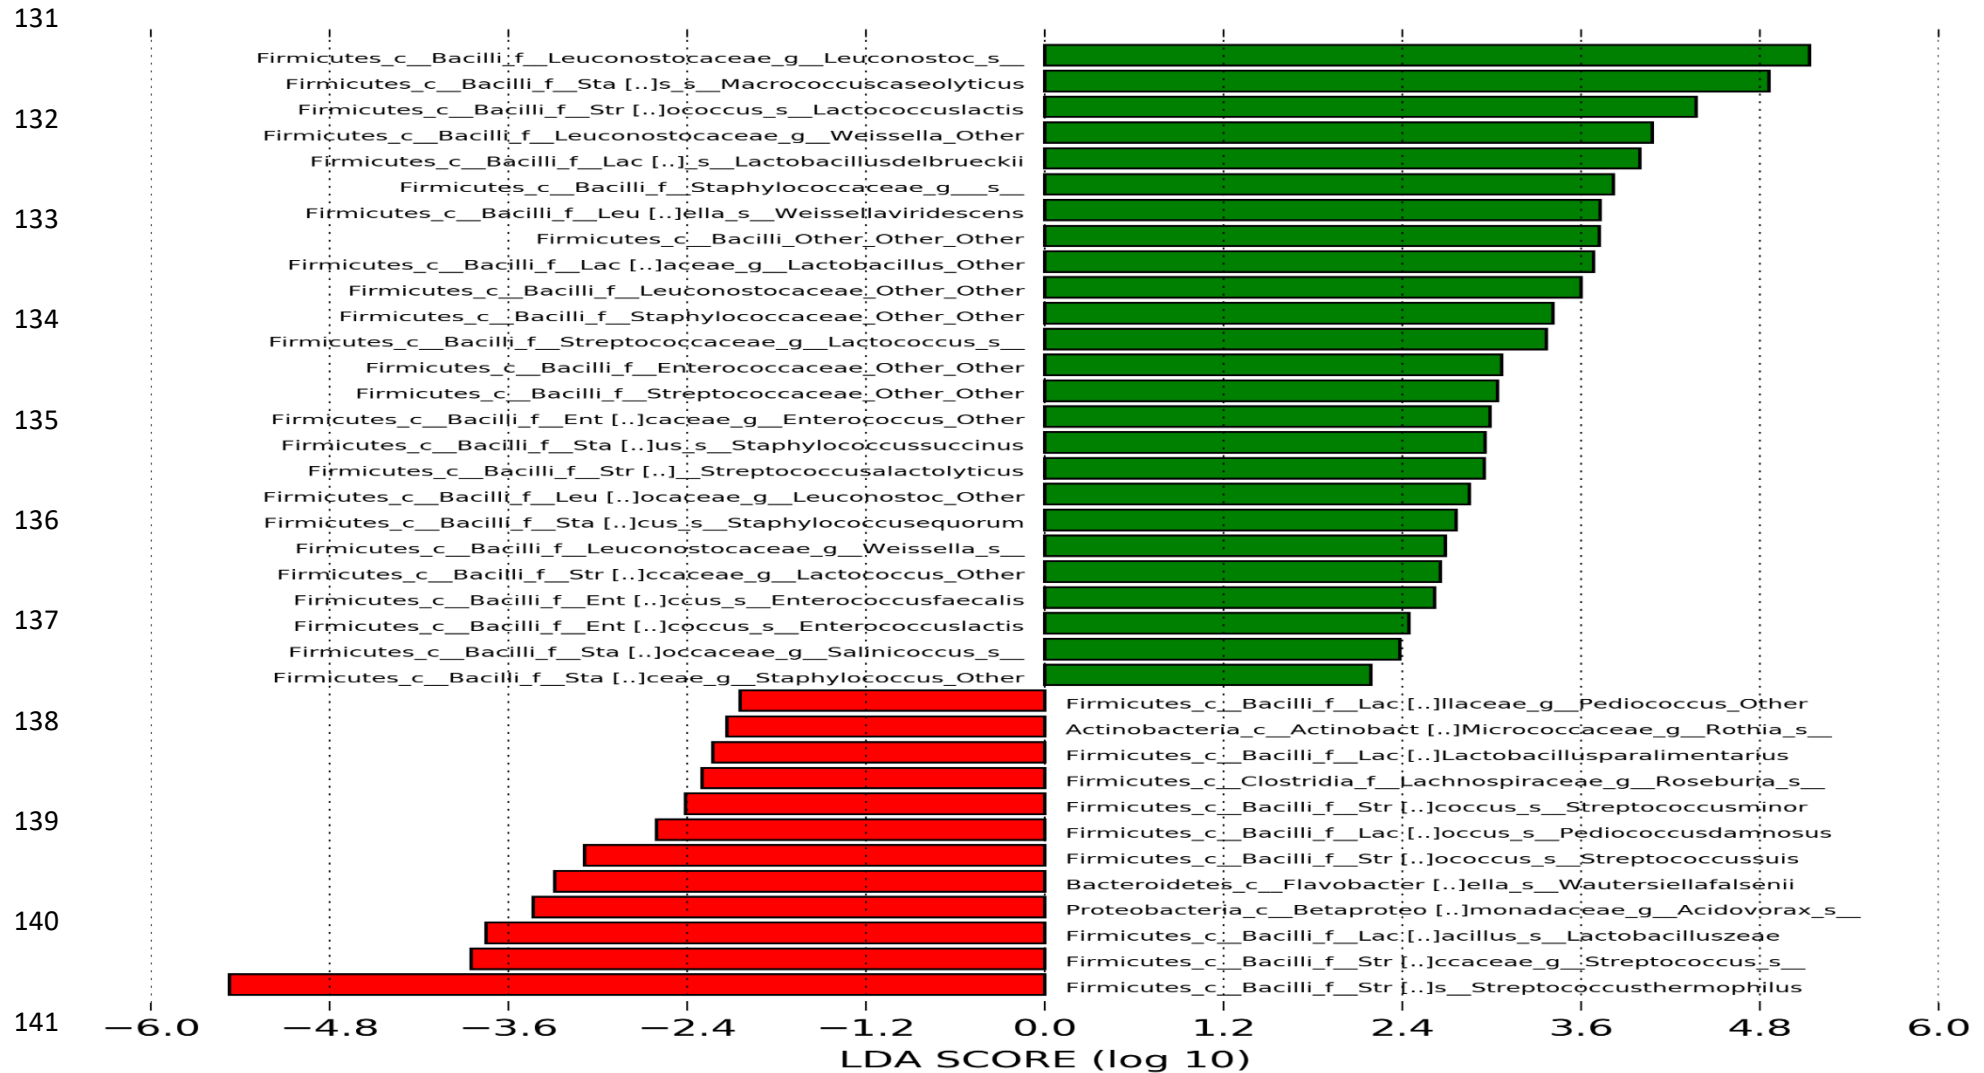

142 **Figure S8.** LEfSe analysis of the microbial communities found, after 20 day of ripening, in the rind of control cheese (CC, in red) and the group of  
 143 cheeses (ATT, LL, VC, SE, BX, MIX, in green) added of attenuated culture of *Lactococcus lactis* subsp. *lactis* CC1.



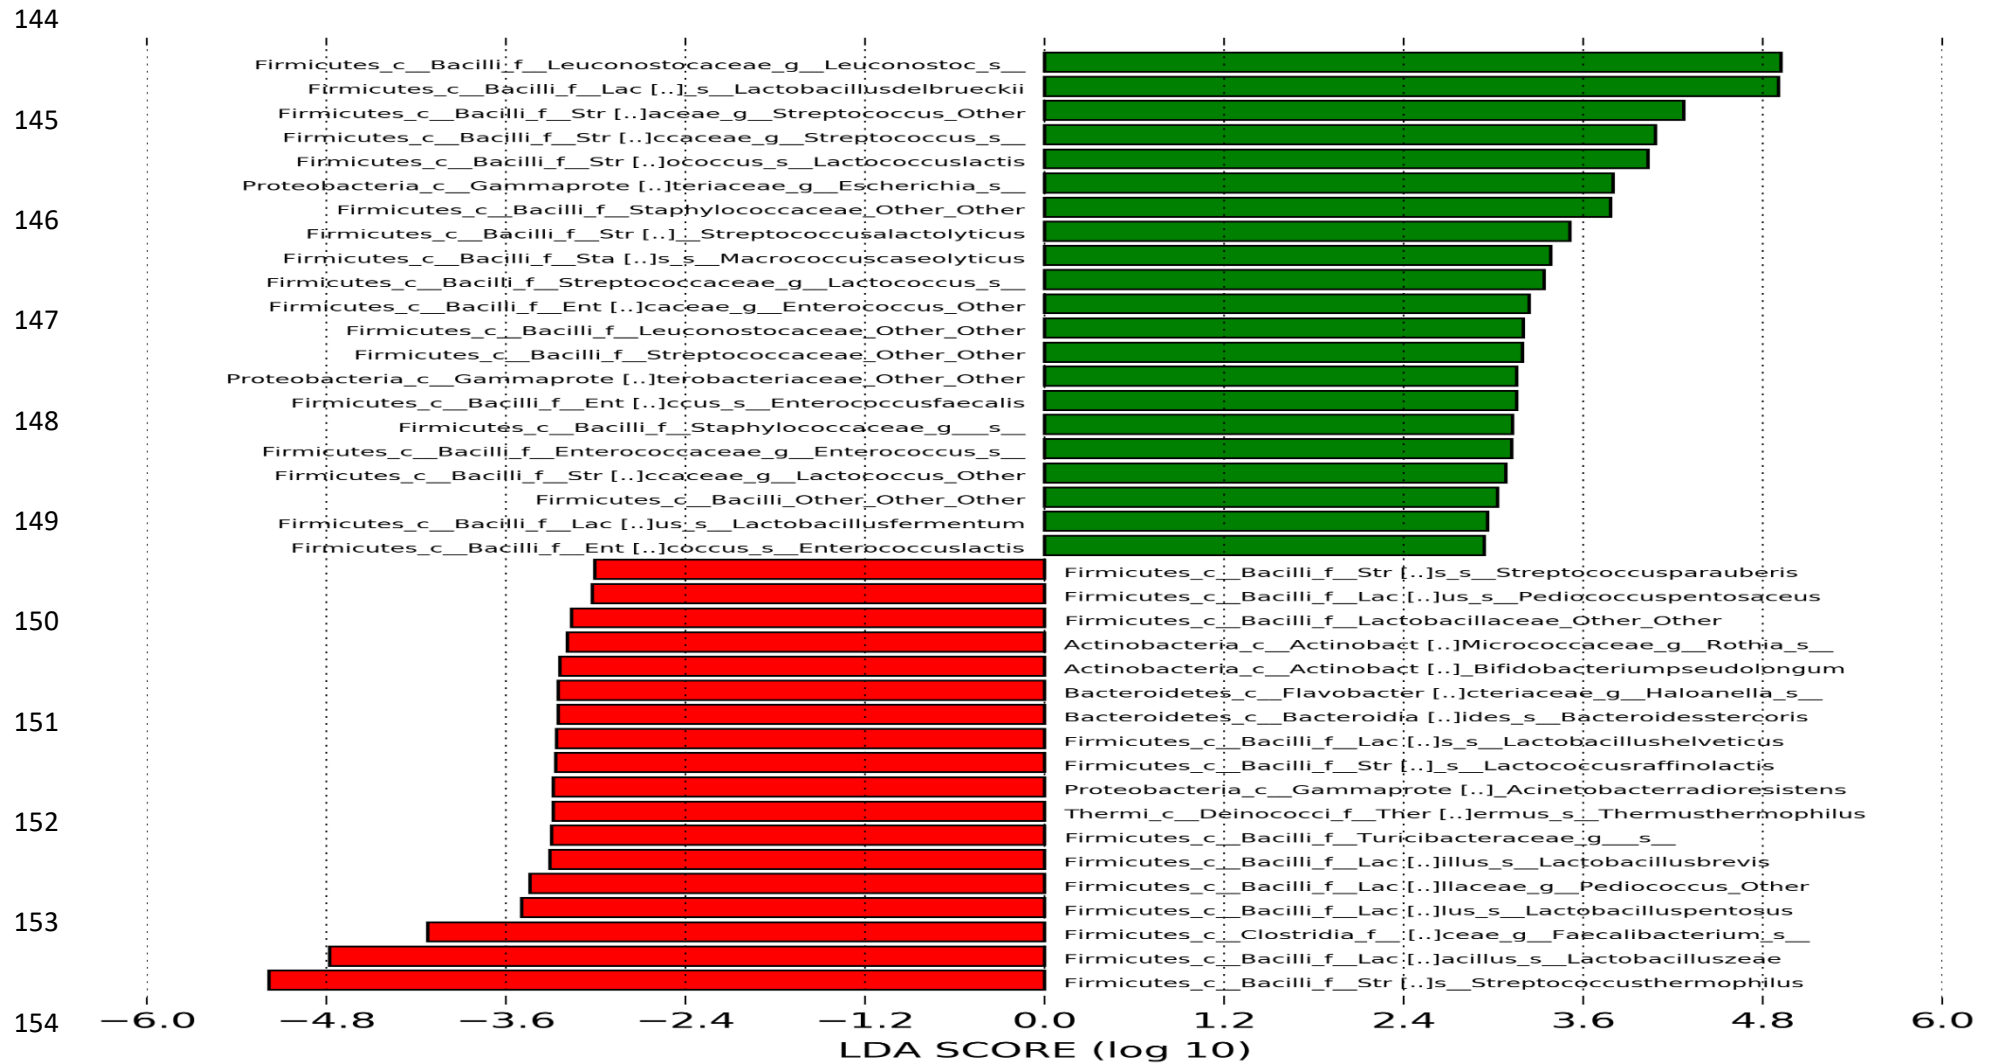

155 **Figure S9.** LEfSe analysis of the microbial communities found, after 20 day of ripening, in the core of control cheese (CC, in red) and the group of  
 156 cheeses (ATT, LL, VC, SE, BX, MIX, in green) added of attenuated culture of *Lactococcus lactis* subsp. *lactis* CC1.

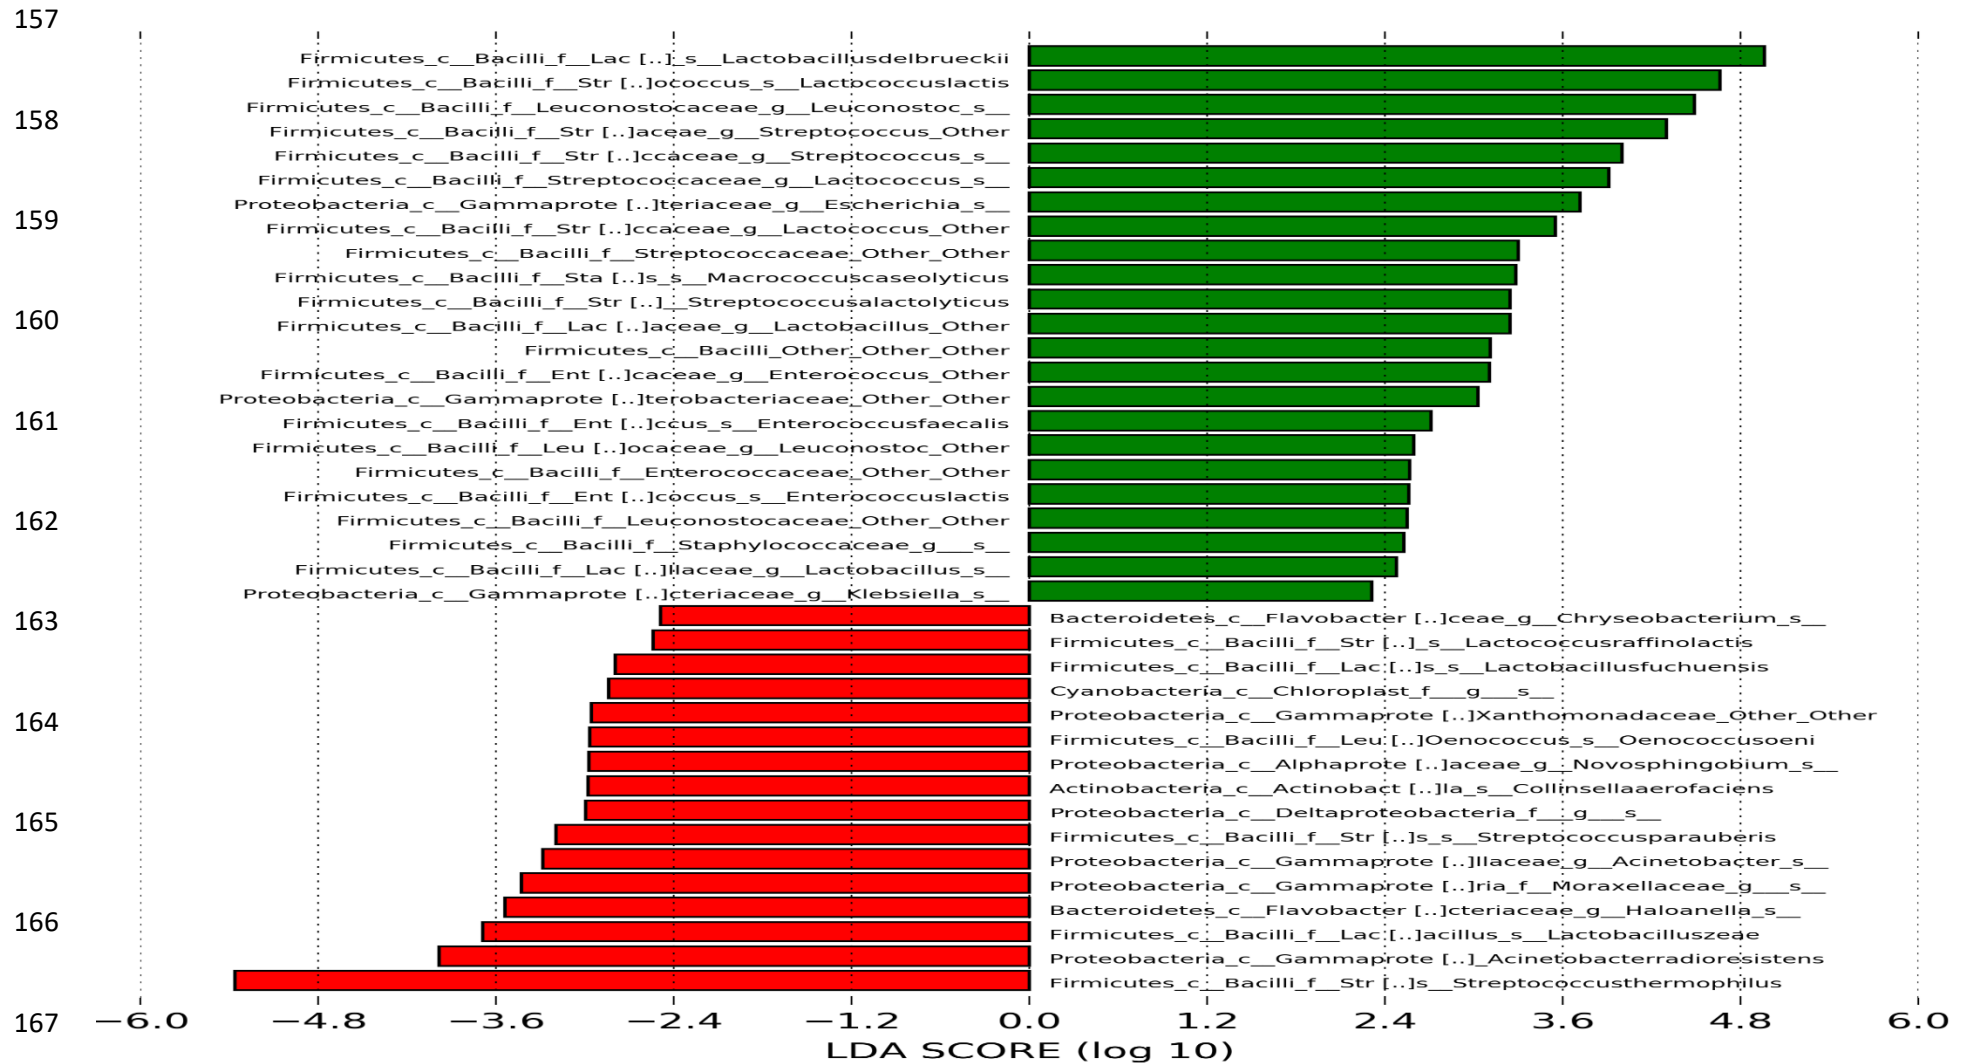

168 **Figure S10.** LEfSe analysis of the microbial communities found, after 30 day of ripening, in the rind of control cheese (CC, in red) and the group of  
 169 cheeses (ATT, LL, VC, SE, BX, MIX, in green) added of attenuated culture of *Lactococcus lactis* subsp. *lactis* CC1.

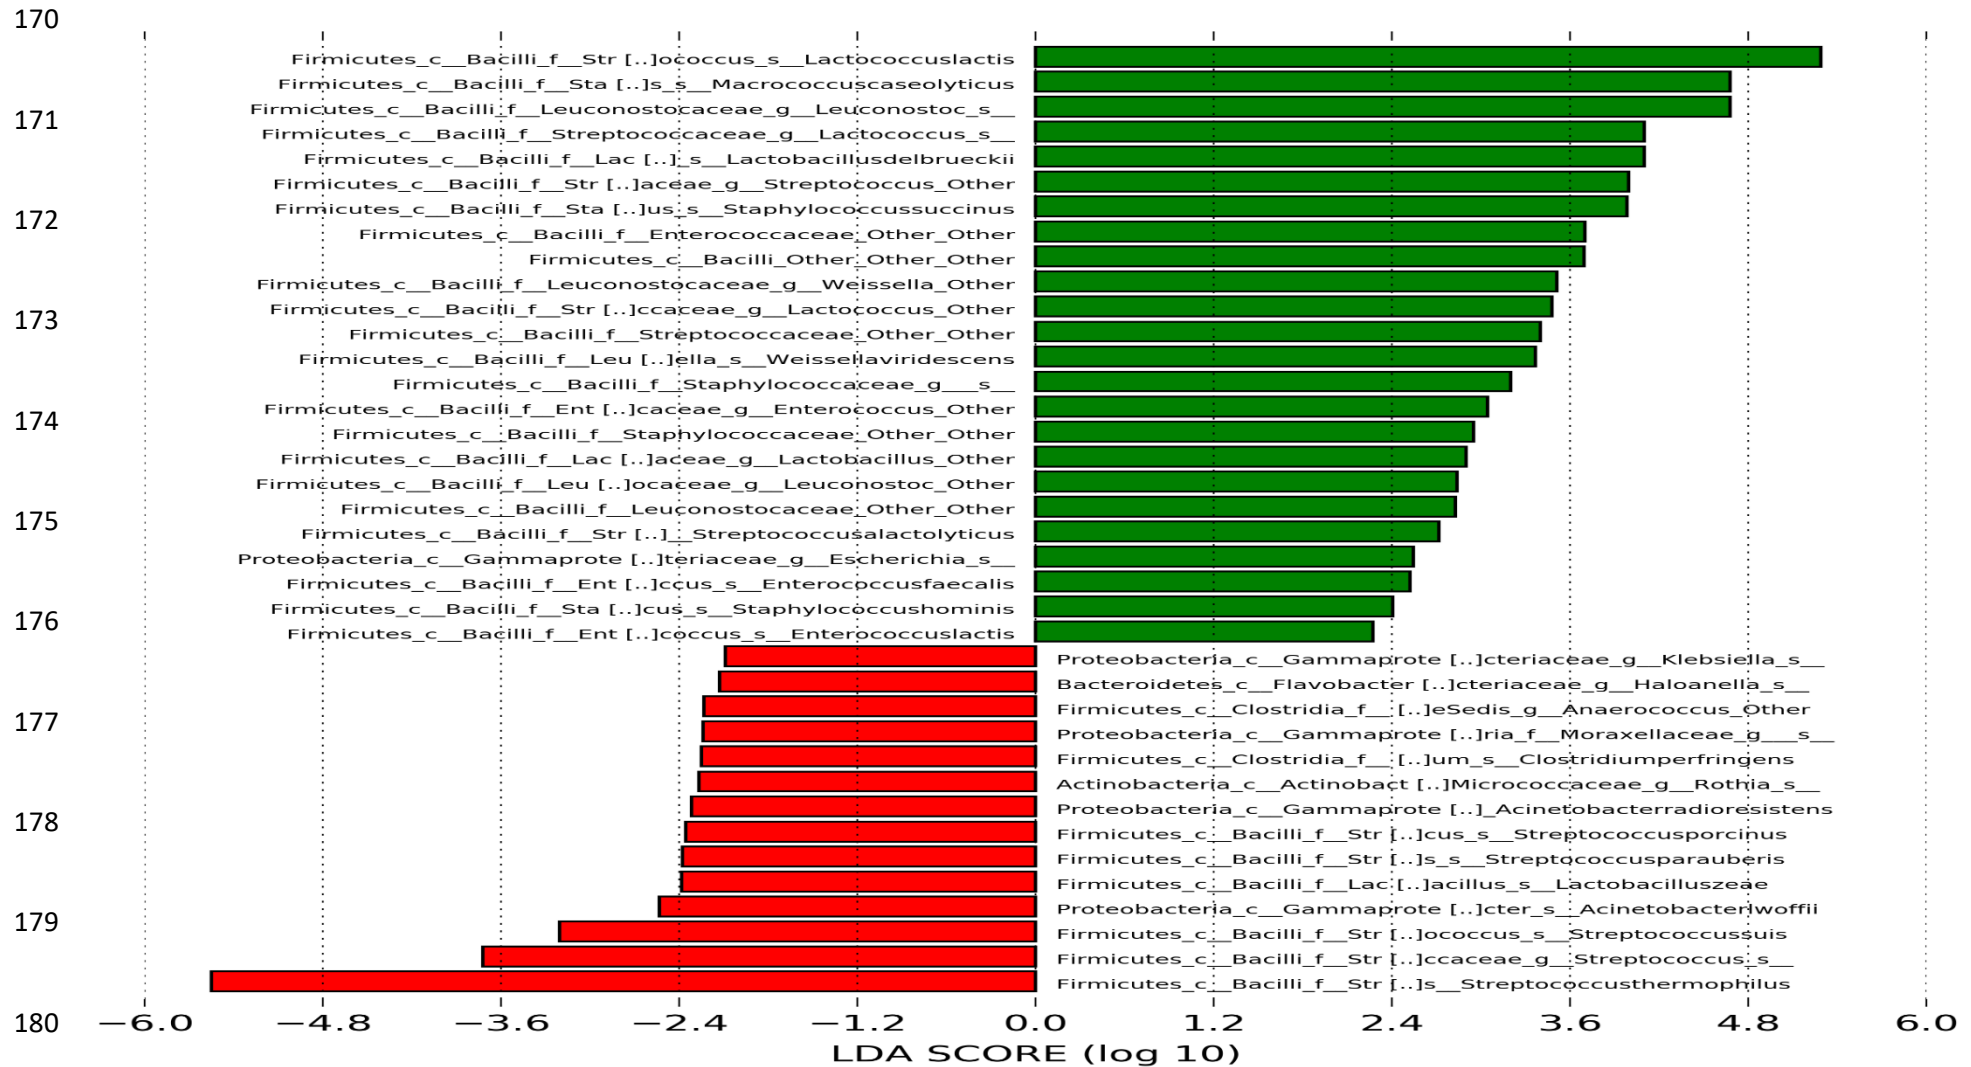

181 **Figure S11.** LEfSe analysis of the microbial communities found, after 30 day of ripening, in the core of control cheese (CC, in red) and the group of  
 182 cheeses (ATT, LL, VC, SE, BX, MIX, in green) added of attenuated culture of *Lactococcus lactis* subsp. *lactis* CC1.

183

184

185

186

187

188

189

190

191

192

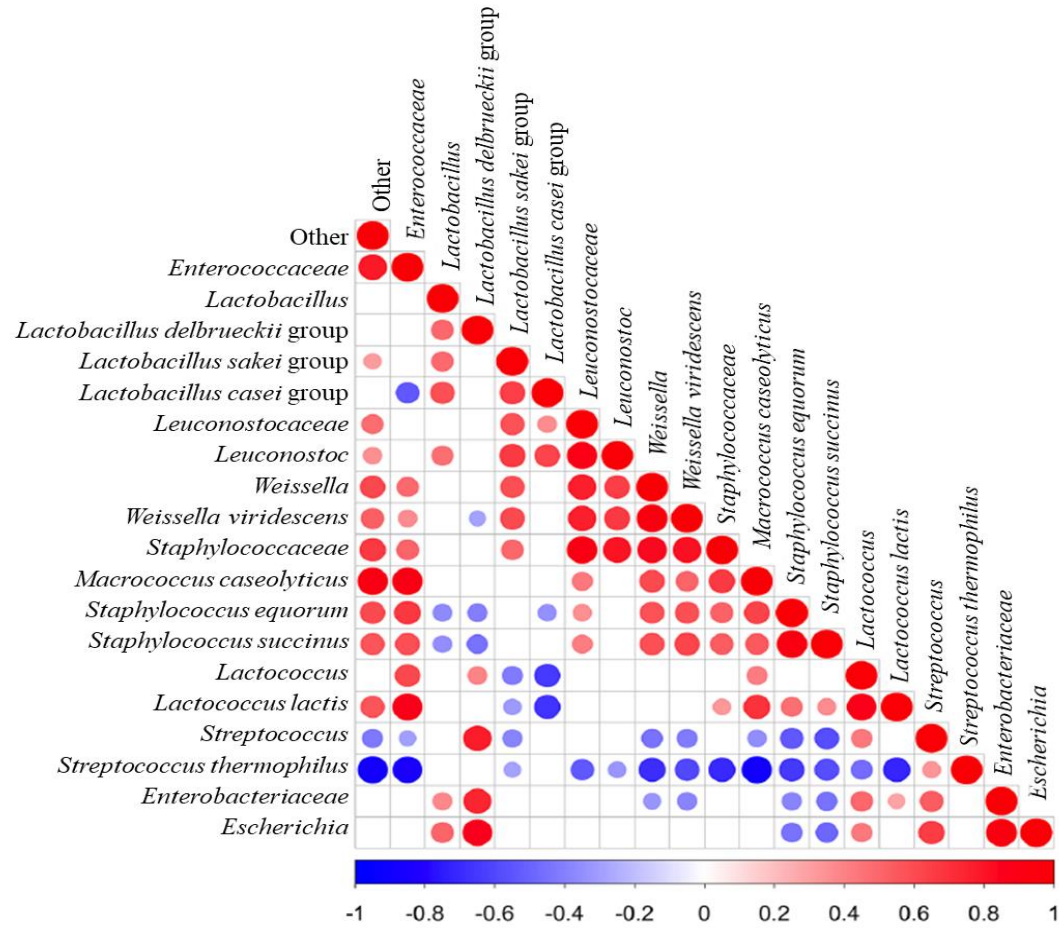

193 **Figure S12.** Significant co-occurrence and co-exclusion relationships between bacteria found in cheeses during ripening, through 16S metagenetic  
 194 analysis. Spearman's rank correlation matrix was used. Strong correlations are indicated by large circles, whereas weak correlations are indicated by  
 195 small circles. The colors of the scale bar denote the nature of the correlation, with 1 indicating a perfectly positive correlation (dark red) and -1  
 196 indicating a perfectly negative correlation (dark blue) between two bacterial OTUs. Only significant correlations (FDR < 0.05) are shown.

197

198

199

200

201

202

203

204

205

206

207

208

209

210

211

212

213

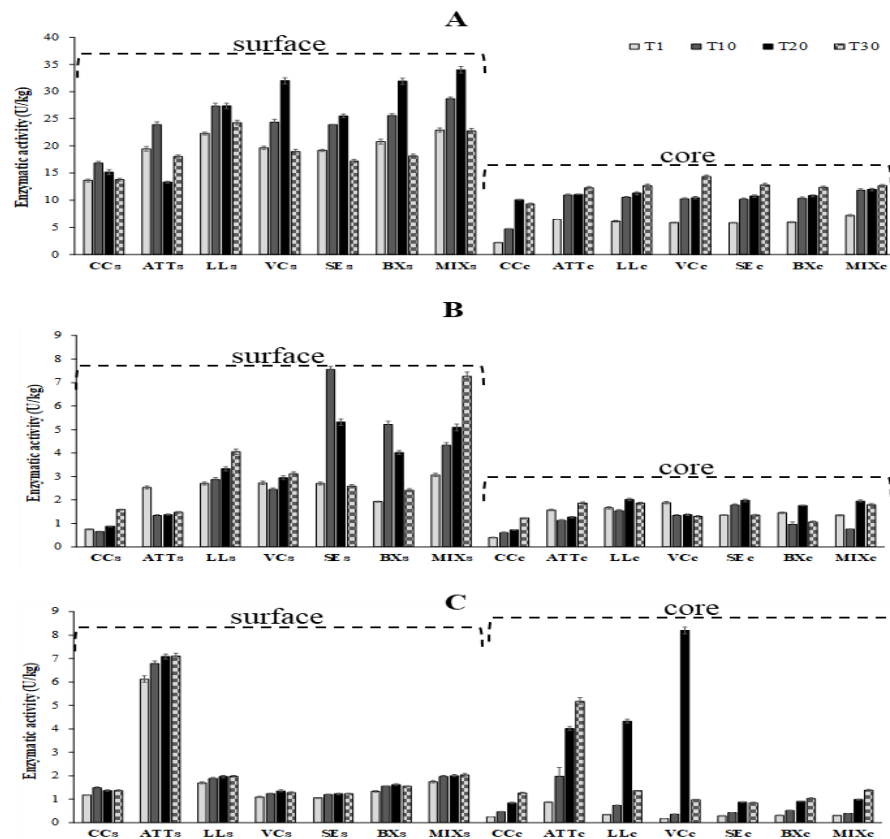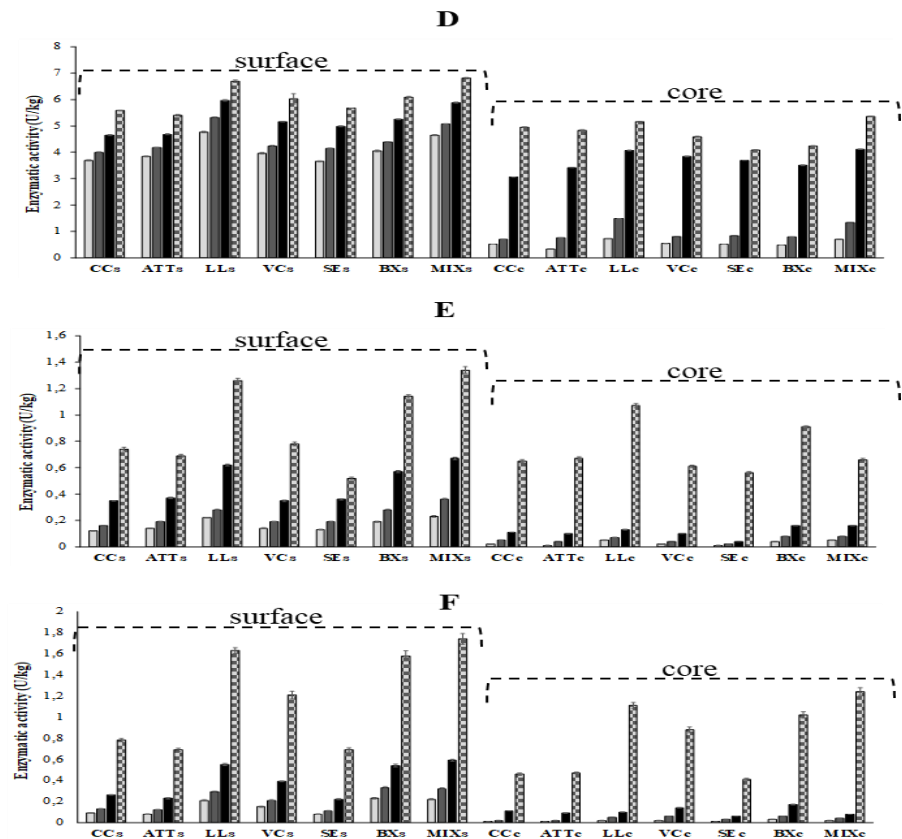

**Figure S13.** Enzymatic activities found at surface (s) and core (c) level of control cheese (CC), cheese added of attenuated culture of *Lactococcus*

*lactis* subsp. *lactis* CC01 (ATT) and ATT cheeses with the additions, as surface adjunct cultures ( $2 \log \text{CFU}/\text{cm}^2$ ), of *Leuconostoc lactis* MC11 (LL),

*Vibrio casei* DSM22364, (VC), *Staphylococcus equorum* DSM15097 (SE), *Brochothrix thermosphacta* MC25 (BX) individually or in mix (MIX),

after 1 (T1), 10 (T10), 20 (T20) or 30 (T30) days of ripening. Panels show activities of aminopeptidase type N (A), proline iminopeptidase (B),

214 endopeptidase type O (C), glutamate dehydrogenase (D), cystathionine- $\gamma$ -lyase (E), and esterase (F). Values represent the average ( $\pm$  SD) of analysis  
215 performed on three samples coming from as many cheese-making experiments.

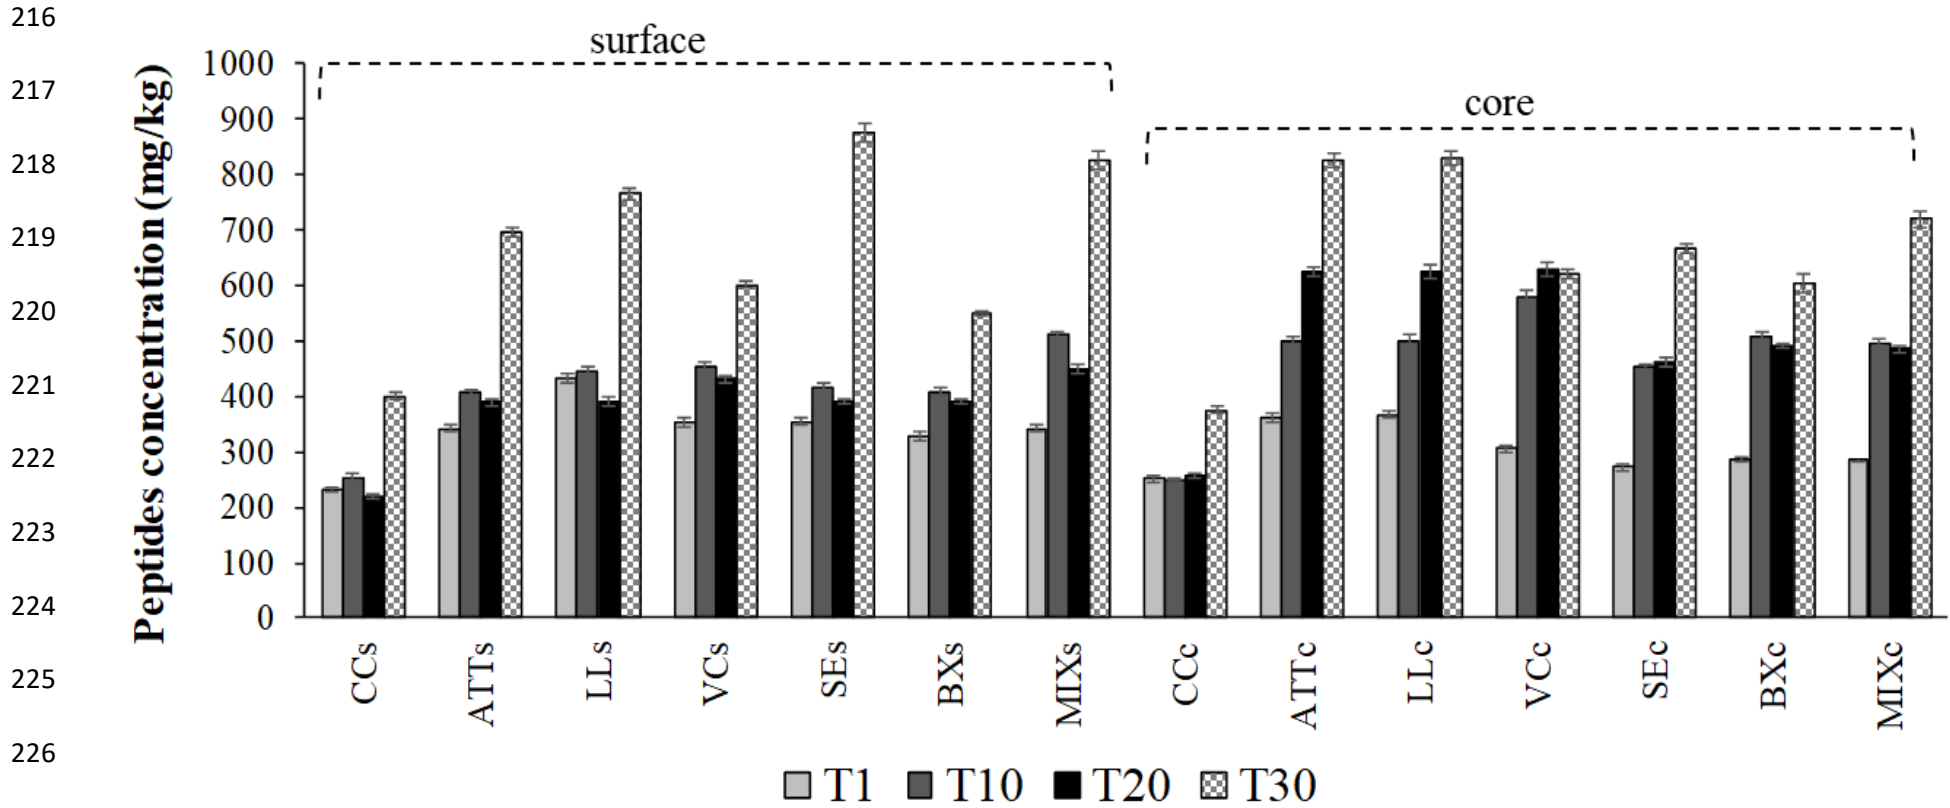

228 **Figure S14.** Peptides concentration found at surface (s) and core (c) level of control cheese (CC), cheese added of attenuated culture of *Lactococcus*  
 229 *lactis* subsp. *lactis* CC01 (ATT) and ATT cheeses with the additions, as surface adjunct cultures (2 log CFU/cm<sup>2</sup>), of *Leuconostoc lactis* MC11 (LL),  
 230 *Vibrio casei* DSM22364 (VC), *Staphylococcus equorum* DSM15097 (SE), *Brochothrix thermosphacta* MC25 (BX) individually or in mix (MIX),  
 231 after 1 (T1), 10 (T10), 20 (T20) or 30 (T30) days of ripening. Values represent the average ( $\pm$  SD) of analysis performed on three samples coming  
 232 from as many from as many cheese-making experiments.





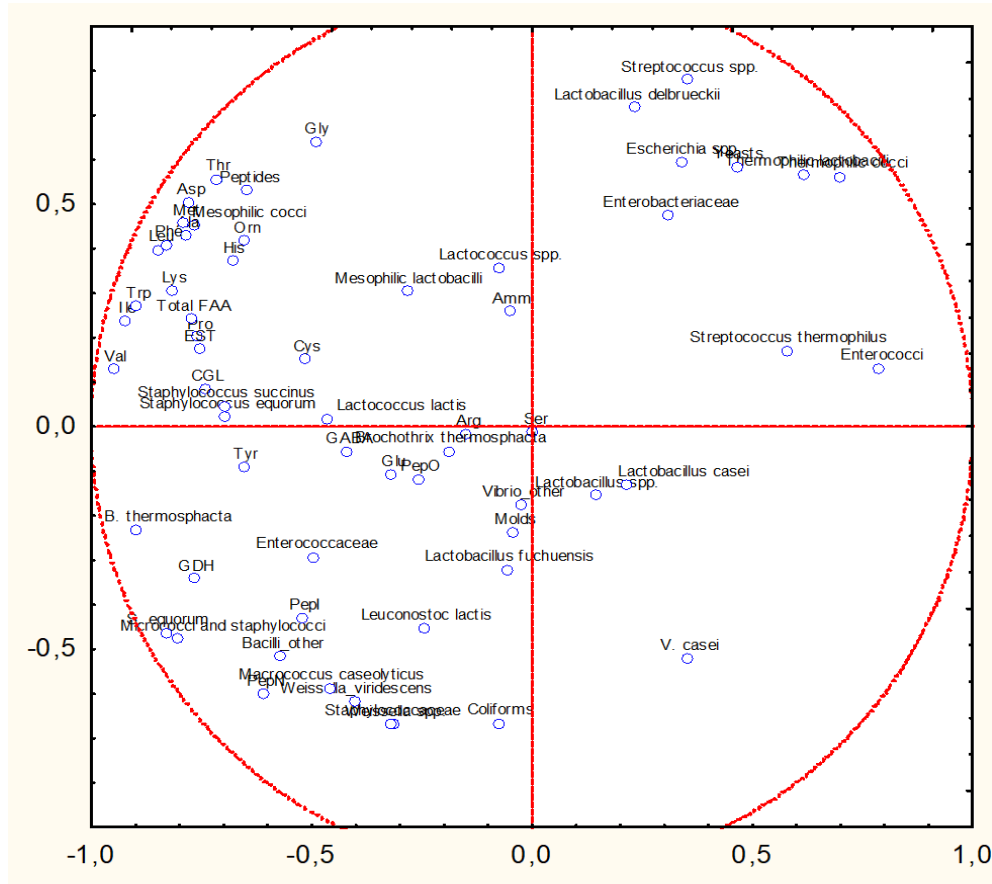

247  
248  
249  
250  
251  
252  
253  
254  
255

256 **Figure S15B.** Loading plot of first and second principal components (PC) after PC analysis based on cultivable and total bacteria, peptides, enzymatic  
 257 activities and individual and total free amino acids that mainly ( $P < 0.05$ ) differentiated at surface (s) and core (c) level the control cheese (CC), cheese  
 258 added of attenuated culture of *Lactococcus lactis* subsp. *lactis* CC01 (ATT) and ATT cheeses with the additions, as surface adjunct cultures (2 log  
 259 CFU/cm<sup>2</sup>), of *Leuconostoc lactis* MC11 (LL), *Vibrio casei* DSM22364 (VC), *Staphylococcus equorum* DSM15097 (SE), *Brochothrix thermosphacta*  
 260 MC25 (BX) individually or in mix (MIX), after 1, 10, 20 or 30 days of ripening.

## 261 MATERIALS AND METHODS

262 **Kinetics of growth.** Cells of *Leuc. lactis*, *V. casei*, *B. thermosphacta* and *St. equorum* grown on the  
263 respective broth media for 24 h at 30°C were harvested by centrifugation, washed with sterile  
264 phosphate buffer 50 mM pH 7.0, and re-suspended at the cell density of ca. 7.0 log CFU/mL. Each  
265 bacterial suspension was singly used to inoculate the CB medium (71) at a final cell density of 2.0  
266 log CFU/ml. The incubation was at room temperature (25 °C) for the first 12 h and further incubated  
267 at 9 °C for ten days. At intervals of 24 h, cell density was estimated by plating on the respective agar  
268 media.

269 **Enzyme activities of attenuated and surface adjunct cultures.** The enzymatic activities were  
270 determined as previously described by De Angelis et al. (72). In detail, *Lc. lactis*, *Leuc. lactis*, *V.*  
271 *casei*, *B. thermosphacta* and *St. equorum* were singly inoculated in CB medium at an initial cell  
272 density of 7.0 log CFU/ml and incubated at 30 °C for 24 h. After incubation, cells were collected by  
273 centrifugation (10,000 × g, 10 min at 4°C), washed in sterile phosphate buffer 50 mM pH 7.0, and  
274 used for enzymatic assays at a final cell density of 8.5±0.3 log CFU/ml. Aminopeptidase (EC  
275 3.4.11.11, pepN) type N activity on Leu-*p*-nitroanilide (Leu-*p*NA), proline iminopeptidase (EC  
276 3.4.11.9, pepI) activity on Pro-*p*-nitroanilide (Pro-*p*NA), and endopeptidase type O (EC 3.4.23, pepO)  
277 activity on Z-Gly-Pro-NH-trifluoromethylcoumarin (Z-Gly-Pro-NA) were determined as described  
278 by Gobbetti et al. (62). An arbitrary unit of enzymatic activity was defined as the amount of  
279 enzymethat caused an increase in absorbance at 410 nm of 1 (pepN) and 0.1 (pepI and pepO) per  
280 minute at 37°C and pH 7.0. The assessment of glutamate dehydrogenase (EC 1.4.1.2, GDH) activity  
281 was on glutamate by measuring the glutamate-dependent reduction of NADP or NAD at 340 nm as  
282 described by De Angelis et al. (63). An arbitrary unit of enzymatic activity was defined as the amount  
283 of enzyme that gave an increase of absorbance of 0.1 per minute at 37°C and pH 7.0. Cystathionine  
284 gamma-lyase (EC 4.4.1.1, CGL) activity was determined by measuring the amount of ketoacids,  
285 ammonia, and free thiols released from cystathionine, as described by De Angelis et al. (73). An

286 arbitrary unit of enzymatic activity was defined as the amount of enzyme that caused an increase of  
287 absorbance (412 nm) of 1 per minute at 37°C and pH 7.0. The esterase activity was determined using  
288  $\alpha$ -naphthyl butyrate as the substrate (74). A unit of esterase activity was defined as the amount of  
289 enzyme that released 1  $\mu$ mol of  $\alpha$ -naphthol per minute at 37°C and pH 7.0.

290 **Table S3.** Definition of the descriptors used during the sensory analysis of Caciotta cheese (adapted  
 291 from (66) and (67).

| <b>Descriptor</b>         | <b>Definition</b>                                                                                                                                               |
|---------------------------|-----------------------------------------------------------------------------------------------------------------------------------------------------------------|
| Uniformity of crust color | Overall uniformity in rind color: presence of either shades or tones reduces uniformity                                                                         |
| Uniformity of core color  | Overall uniformity in core color: presence of either shades or tones reduces uniformity                                                                         |
| Internal structure        | Overall uniformity in structure: presence of either fissures or holes reduces uniformity                                                                        |
| Odor intensity            | Odor arising from butter at room temperature                                                                                                                    |
| Butter taste              | Flavor arising from butter at room temperature                                                                                                                  |
| Rancid smell              | Odor arising from rancid butter at room temperature                                                                                                             |
| Spicy smell               | Odor arising from pepper at room temperature                                                                                                                    |
| Aroma intensity           | Organoleptic attribute perceptible by the olfactory organ via the back of the nose when tasting                                                                 |
| Taste intensity           | Taste recalling milk and butter                                                                                                                                 |
| Moisture                  | Moisture released by the product in the mouth during early mastication (dry: saliva is absorbed by the product; humid: liquids are released during mastication) |
| Acid                      | Fundamental taste associated with citric acid                                                                                                                   |
| Bitter                    | Fundamental taste associated with quinine                                                                                                                       |
| Salty                     | Fundamental taste associated with sodium chloride                                                                                                               |
| Sweet                     | Fundamental taste associated with sucrose                                                                                                                       |

292

293 **REFERENCES**

- 294 21. Calasso M, Ercolini D, Mancini L, Stellato G, Minervini F, Di Cagno R, De Angelis M, Gobbetti  
295 M. 2016. Relationships among house, rind and core microbiotas during manufacture of traditional  
296 Italian cheeses at the same dairy plant. *Food Microbiol* 54:115–126.
- 297 62. Gobbetti M, Folkertsma B, Fox PF, Corsetti A, Smacchi E, De Angelis M, Rossi J, Kilcawley  
298 K, Cortini M. 1999. Microbiology and biochemistry of Fossa (pit) cheese. *Int Dairy J* 9:763–773.
- 299 63. De Angelis M, Calasso M, Di Cagno R, Minervini F, Gobbetti M. 2010. NADP-glutamate  
300 dehydrogenase activity in non-starter lactic acid bacteria: Effects of temperature, pH and NaCl on  
301 enzyme activity and expression. *J Appl Microbiol* 109:1763–1774.
- 302 66. Niro S, Fratianni A, Tremonte P, Sorrentino E, Tipaldi L. 2014. Innovative Caciocavallo cheeses  
303 made from a mixture of cow milk with ewe or goat milk. *J Dairy Sci* 97:1296–1304.
- 304 67. Albenzio M, Santillo A, Caroprese M, Braghieri A, Sevi A, Napolitano F. 2013. Composition  
305 and sensory profiling of probiotic Scamorza ewe milk cheese. *J Dairy Sci* 96 :2792–2800.
- 306 69. Bleicher A, Neuhaus K, Scherer S. 2010. *Vibrio casei* sp. nov., isolated from the surfaces of two  
307 French red smear soft cheeses. *Int J Syst Evol Microbiol* 60:1745–1749.
- 308 70. Place RB, Hiestand D, Gallmann HR, Teuber M. 2003. *Staphylococcus equorum* subsp. *linens*,  
309 subsp. nov., a starter culture component for surface ripened semi-hard cheeses. *Syst Appl Microbiol*  
310 26:30–37.
- 311 71. Neviani E, De Dea Lindner J, Bernini V, Gatti M. 2009. Recovery and differentiation of long  
312 ripened cheese microflora through a new cheese-based cultural medium. *Food Microbiol* 26:240–  
313 245.
- 314 72. De Angelis M, Di Cagno R, Gallo G, Curci M, Siragusa S, Crecchio C, Parente E, Gobbetti M.  
315 2007. Molecular and functional characterization of *Lactobacillus sanfranciscensis* strains isolated  
316 from sourdoughs. *Int J Food Microbiol* 114:69–82.

- 317 73. De Angelis M, Curtin AC, McSweeney PLH, Faccia M, Gobbetti M. 2002. *Lactobacillus reuteri*  
318 DSM 20016: Purification and characterization of a cystathionine  $\gamma$ -lyase and use as adjunct starter  
319 in cheesemaking. J Dairy Res 69:255–267.75.
- 320 74. De Angelis M, Gobbetti M, Corsetti A. 1999. Esterase and lipase activities of *Lactobacillus*  
321 *sanfranciscensis* strains used in sourdough fermentation. Ital J Food Sci 11:167–172.
